# Supplementary material for: A Care Quality Dashboard for General Practitioners Managing Patients with Diabetes Mellitus Type 2: User- Centered Design and Evaluation of a Prototype
Source: Research Square preprint supplement (doi:10.21203/rs.3.rs-8347867/v1), 2026-01-12
Supplement: Supplementary file 6 [file 736d53499264bb109e6664a9.docx]

Screenshots of the SGED Score Dashboard Prototype in German


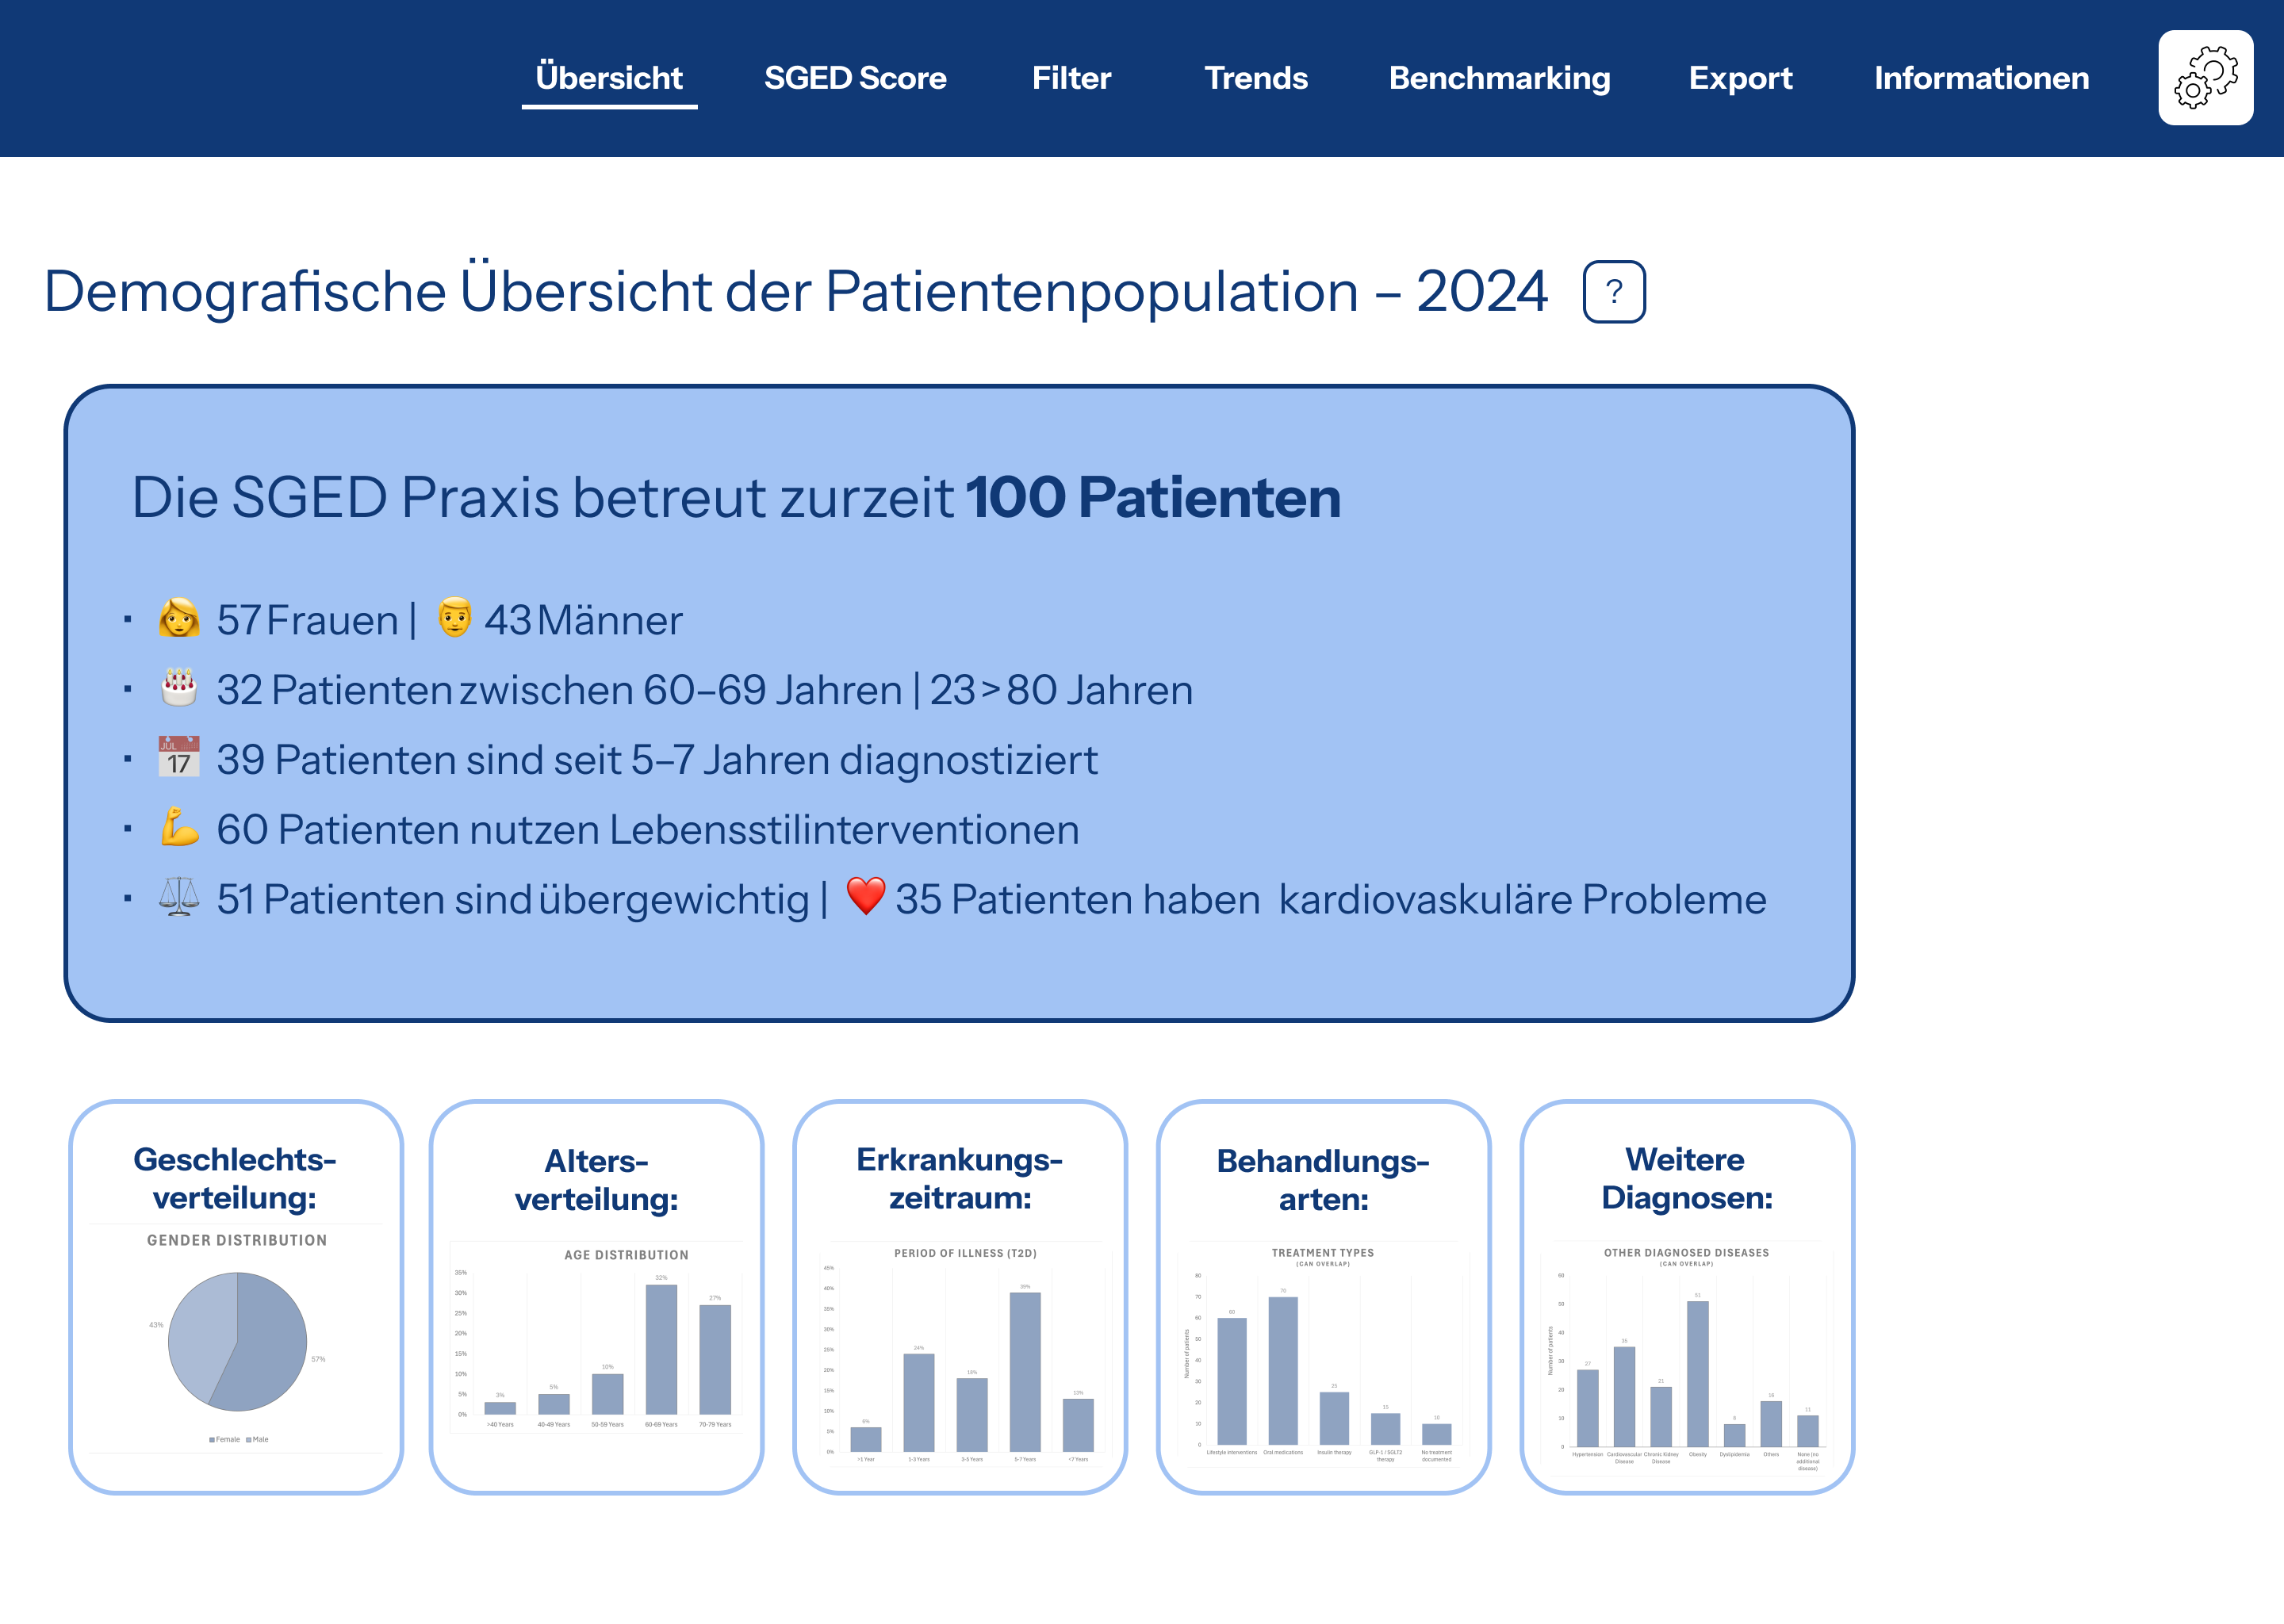


Figure 3: Demographic overview over the patient collective


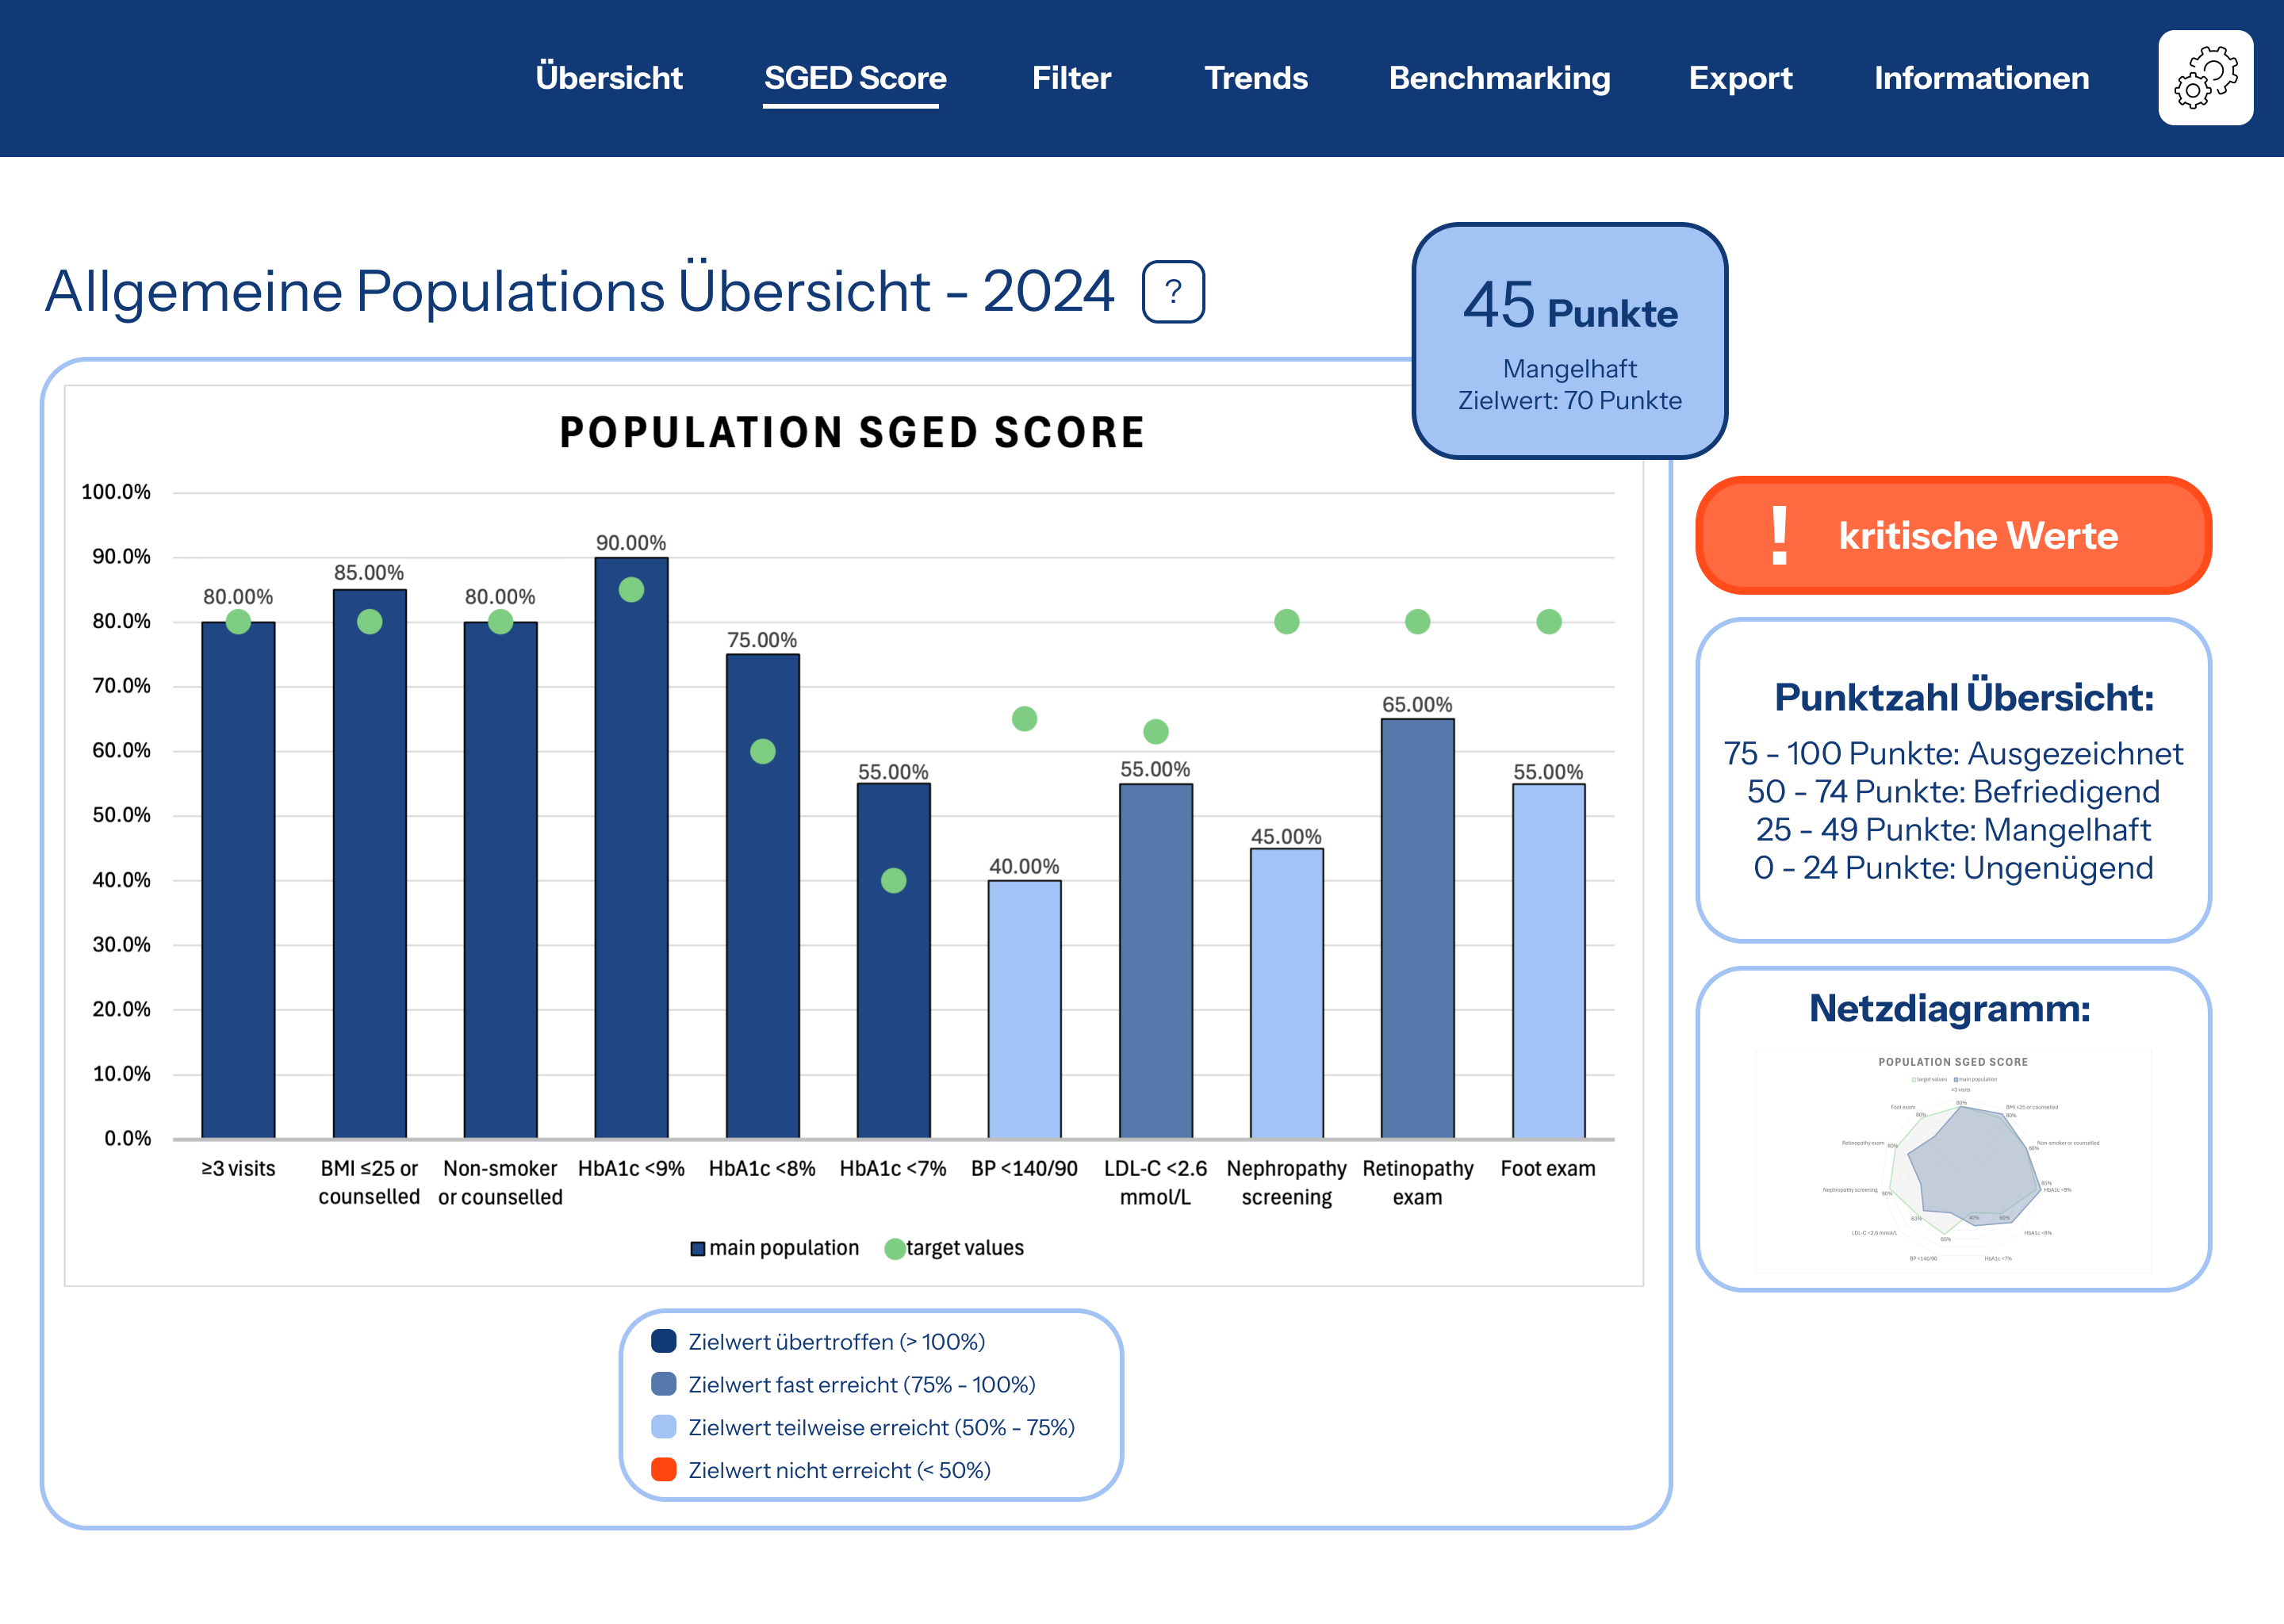


Figure 4: Visualization of the SGED score (main population)


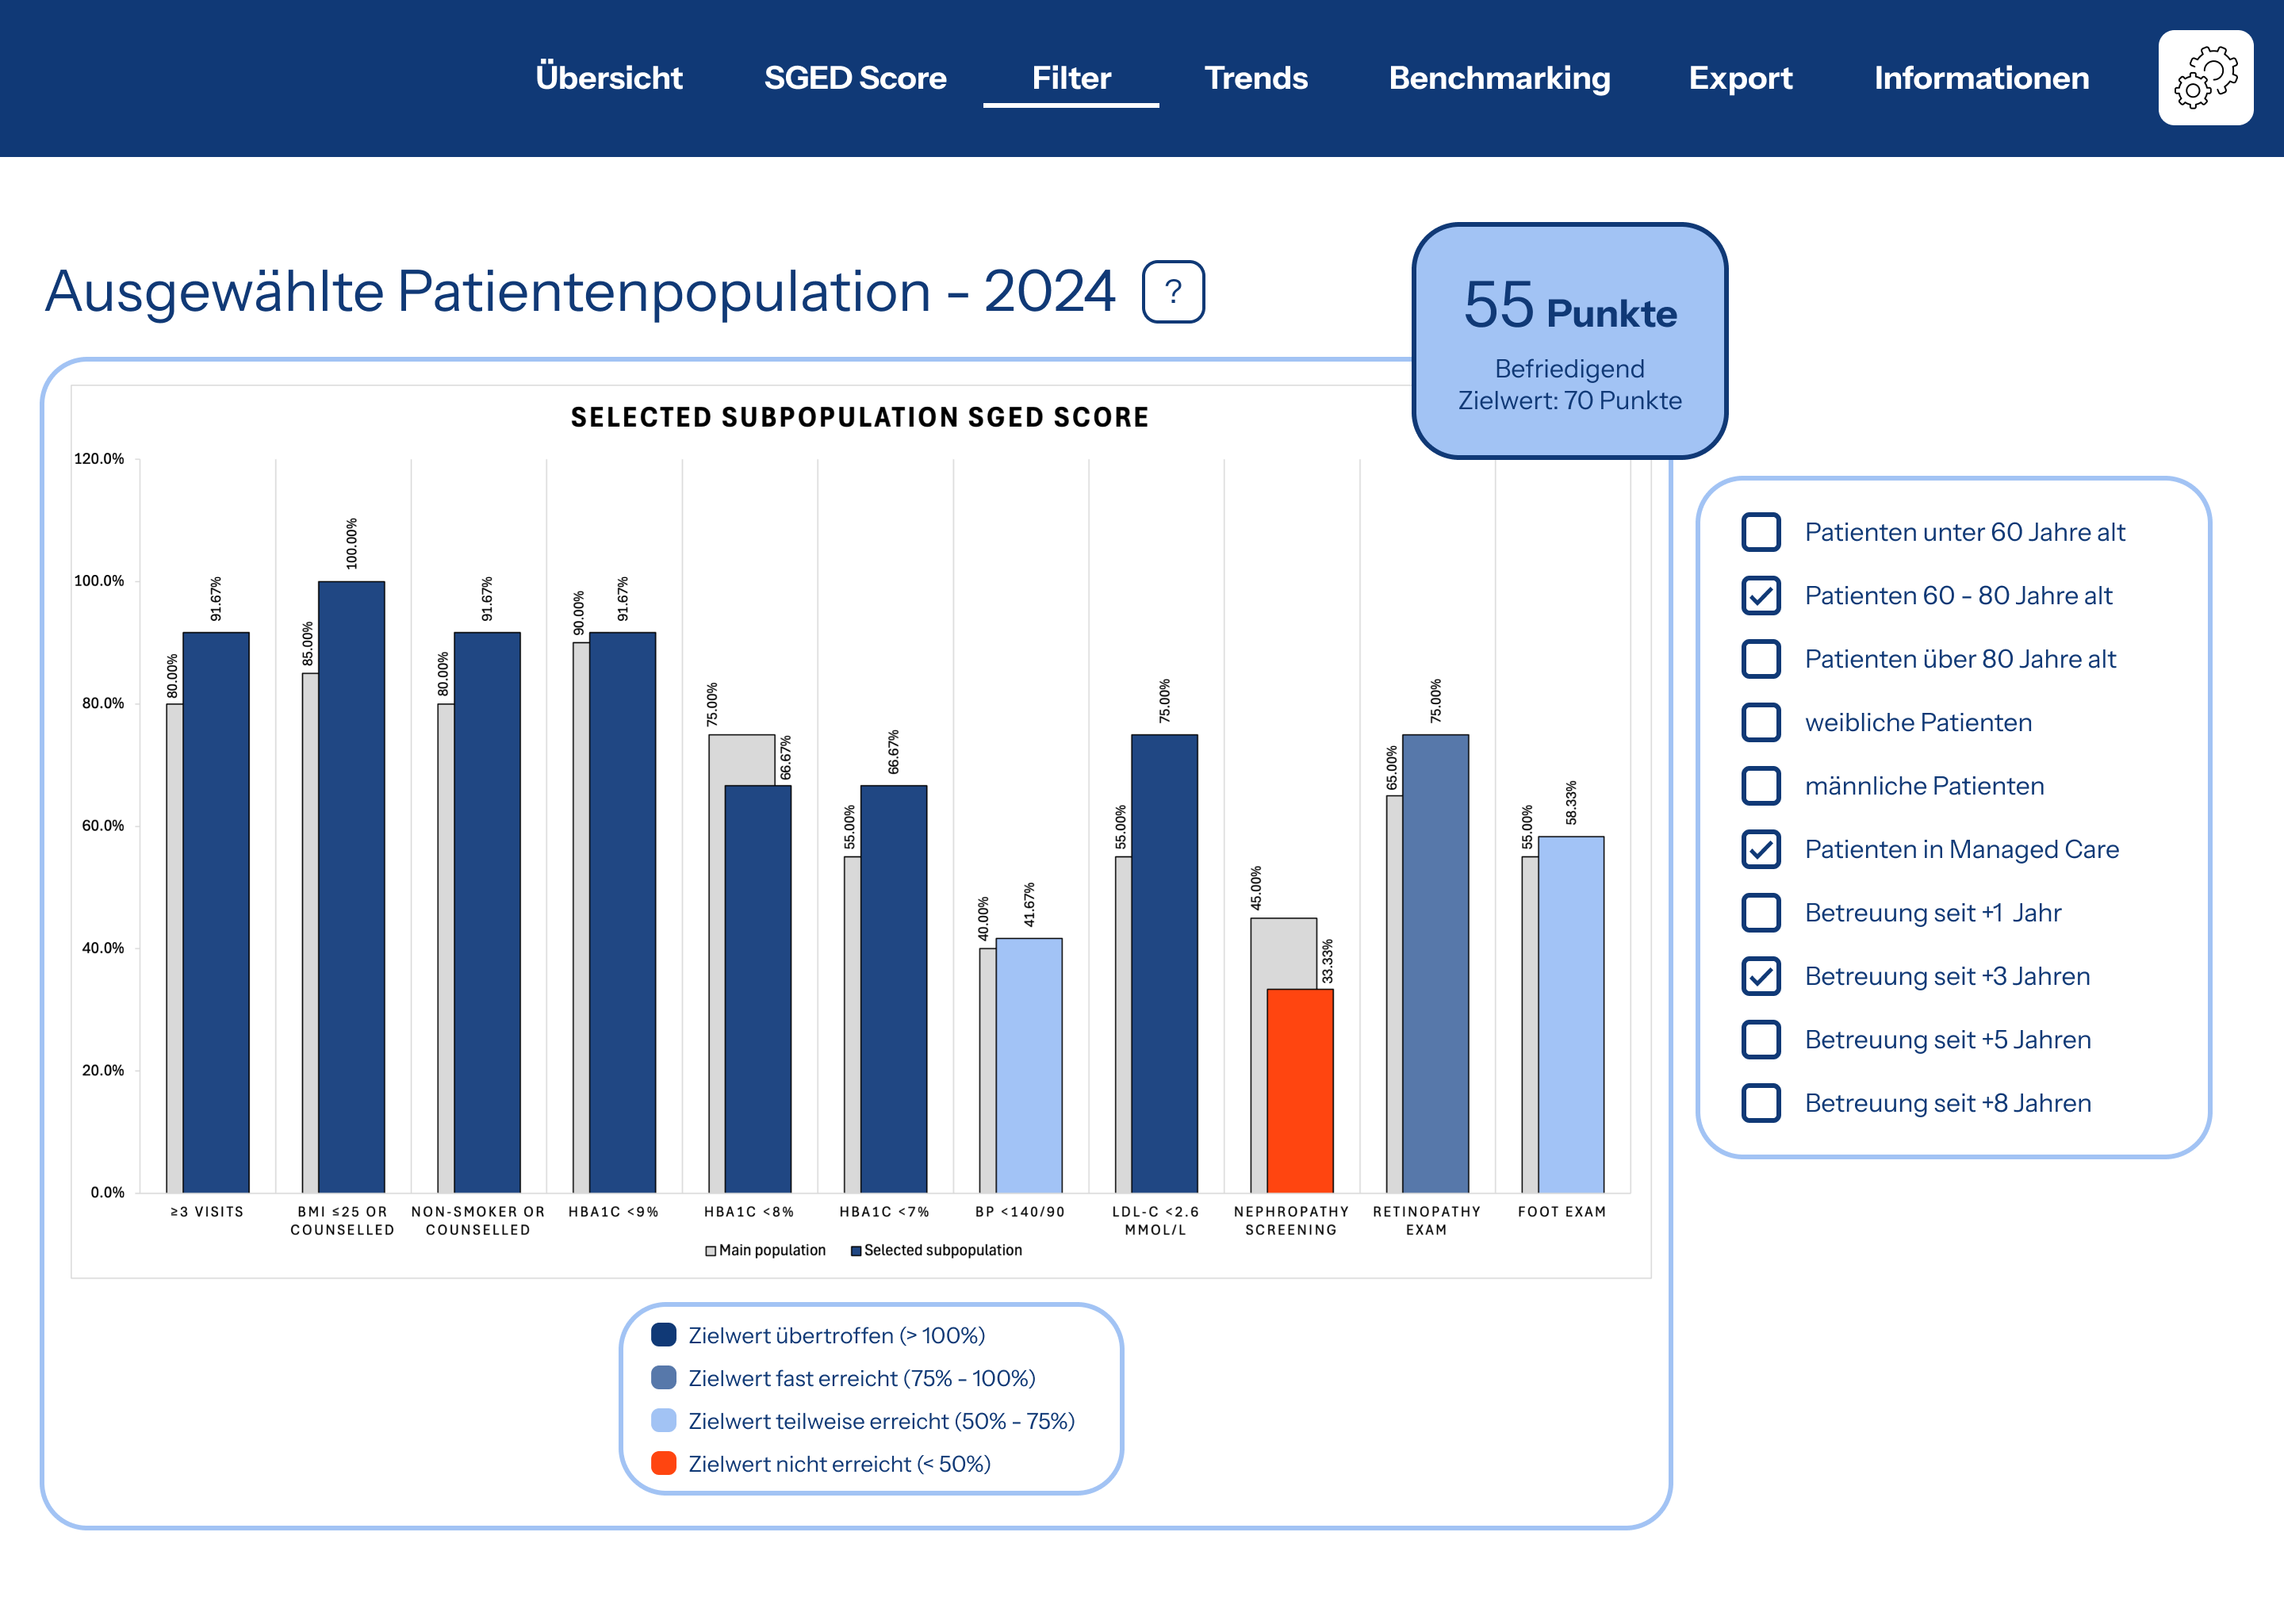


Figure 5: Filter possibilities to identify specific subgroups


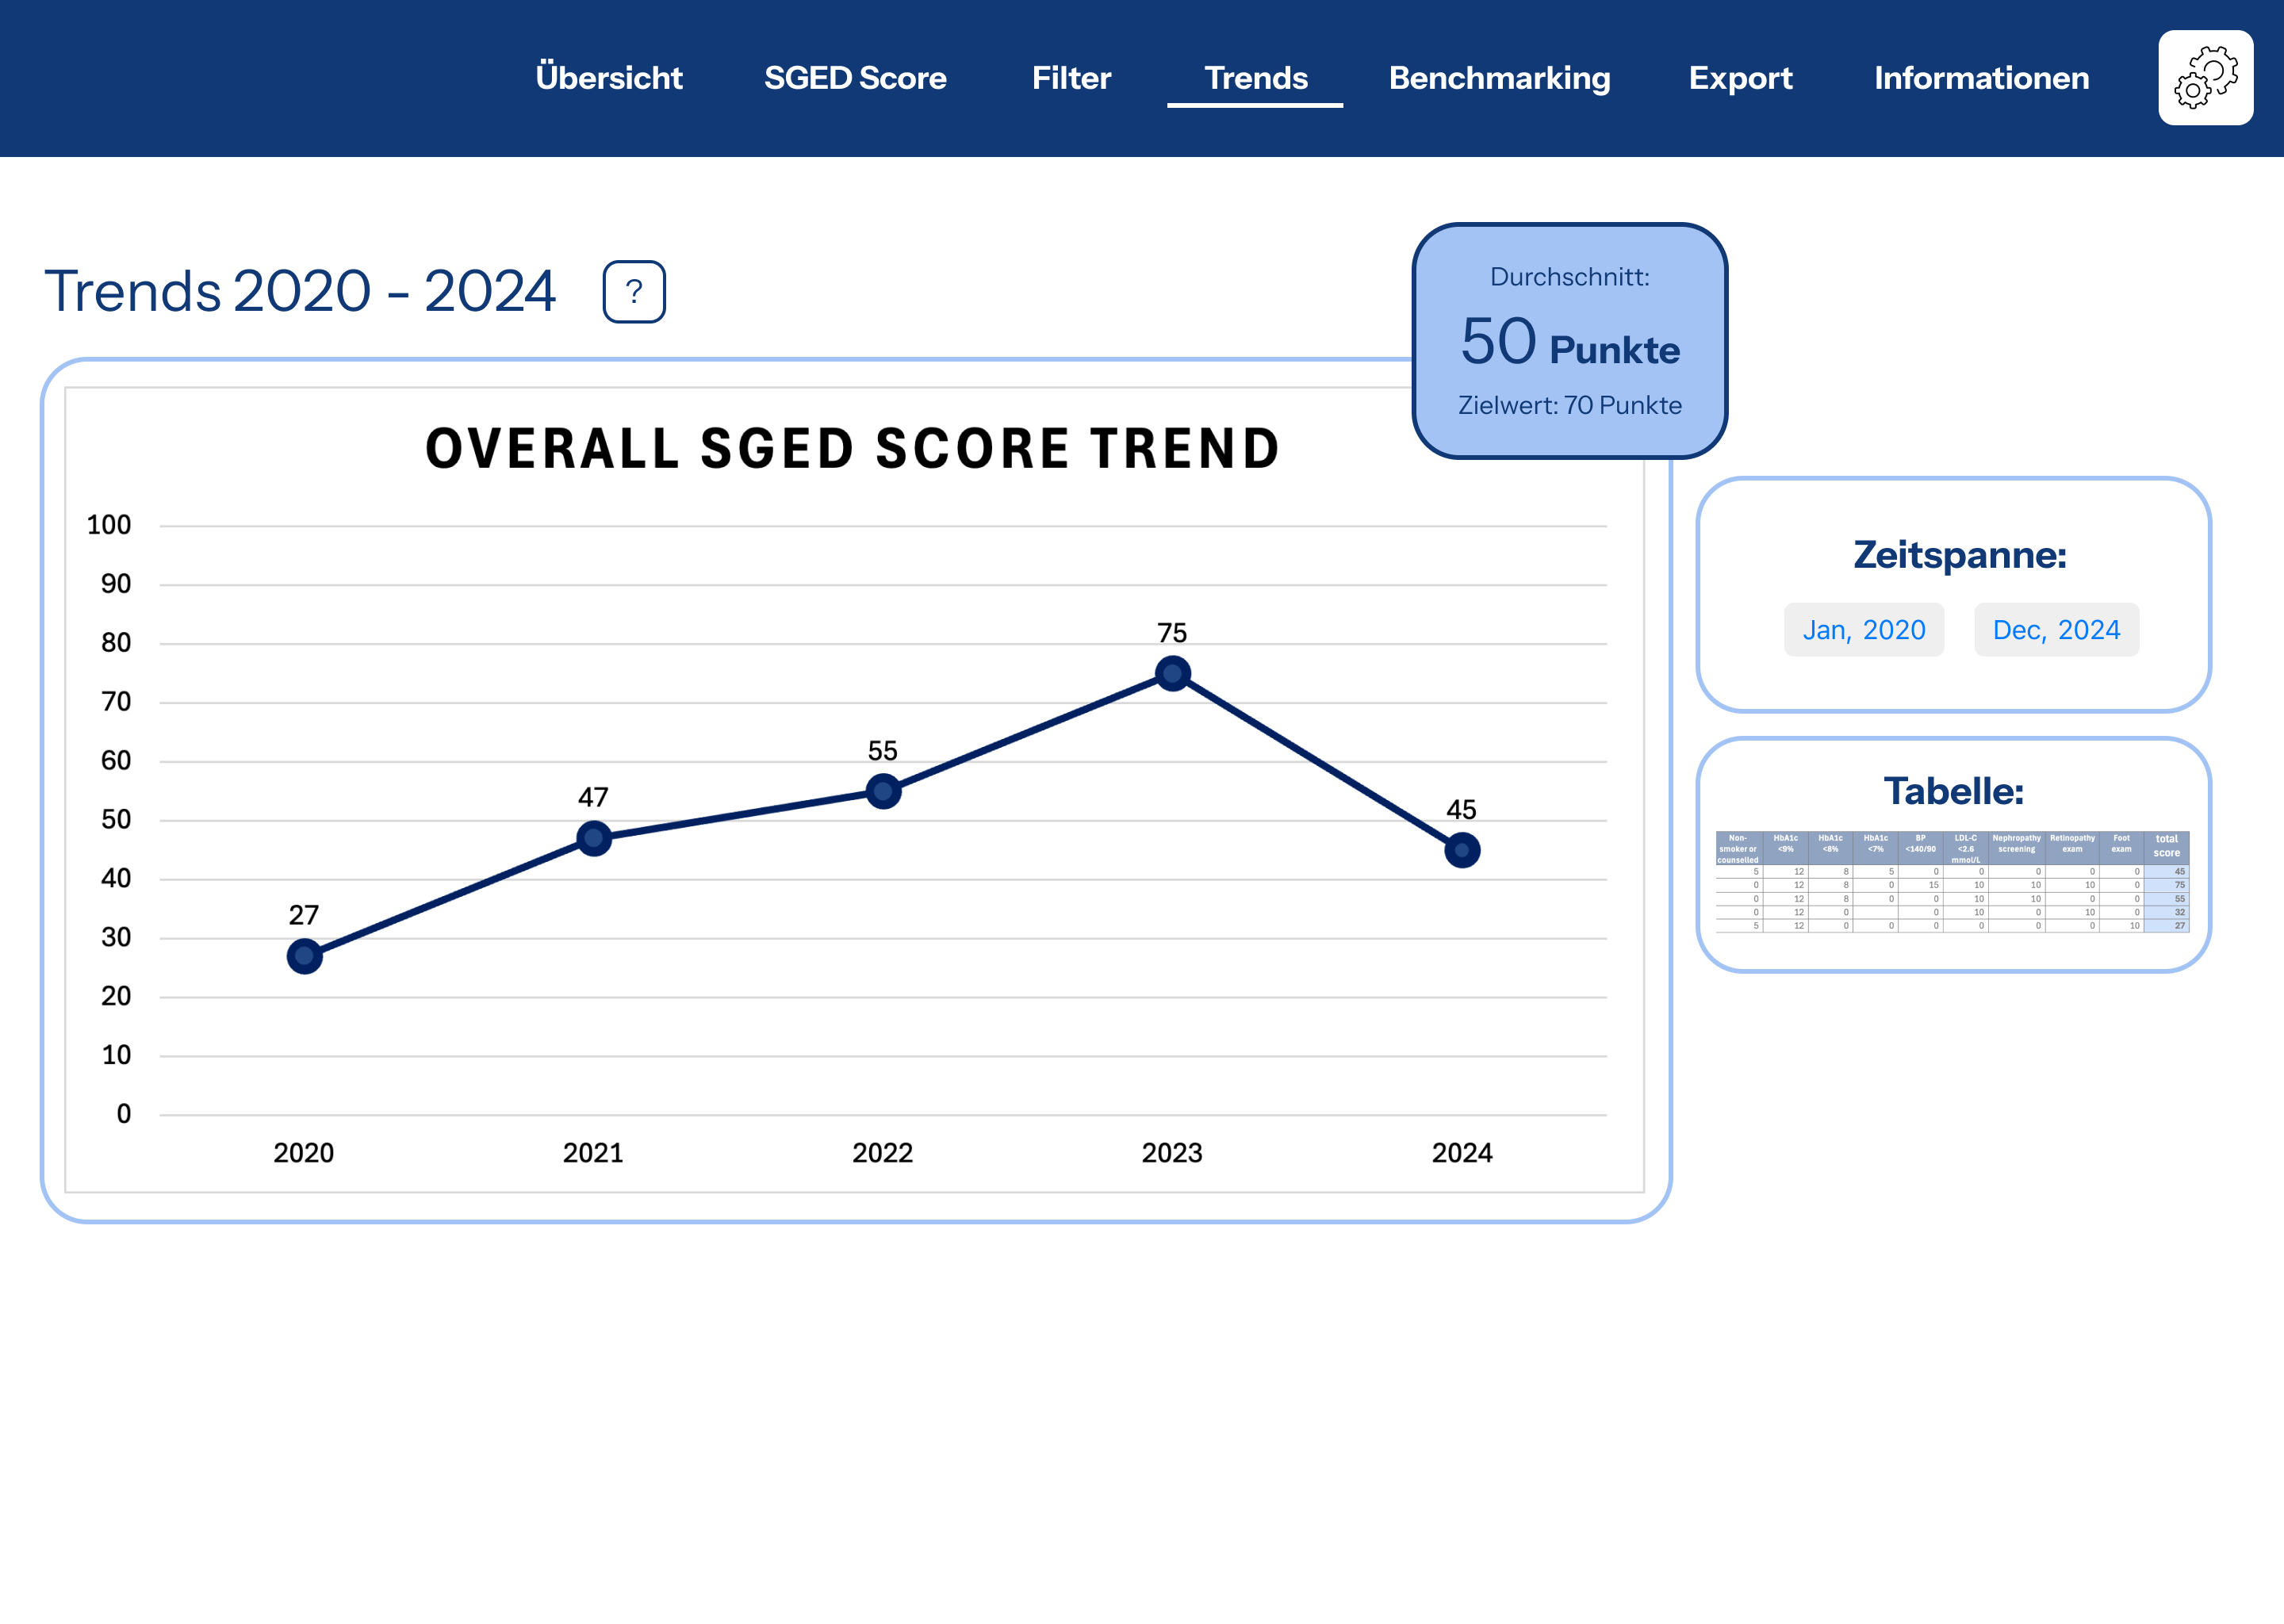


Figure 6: Long term trends


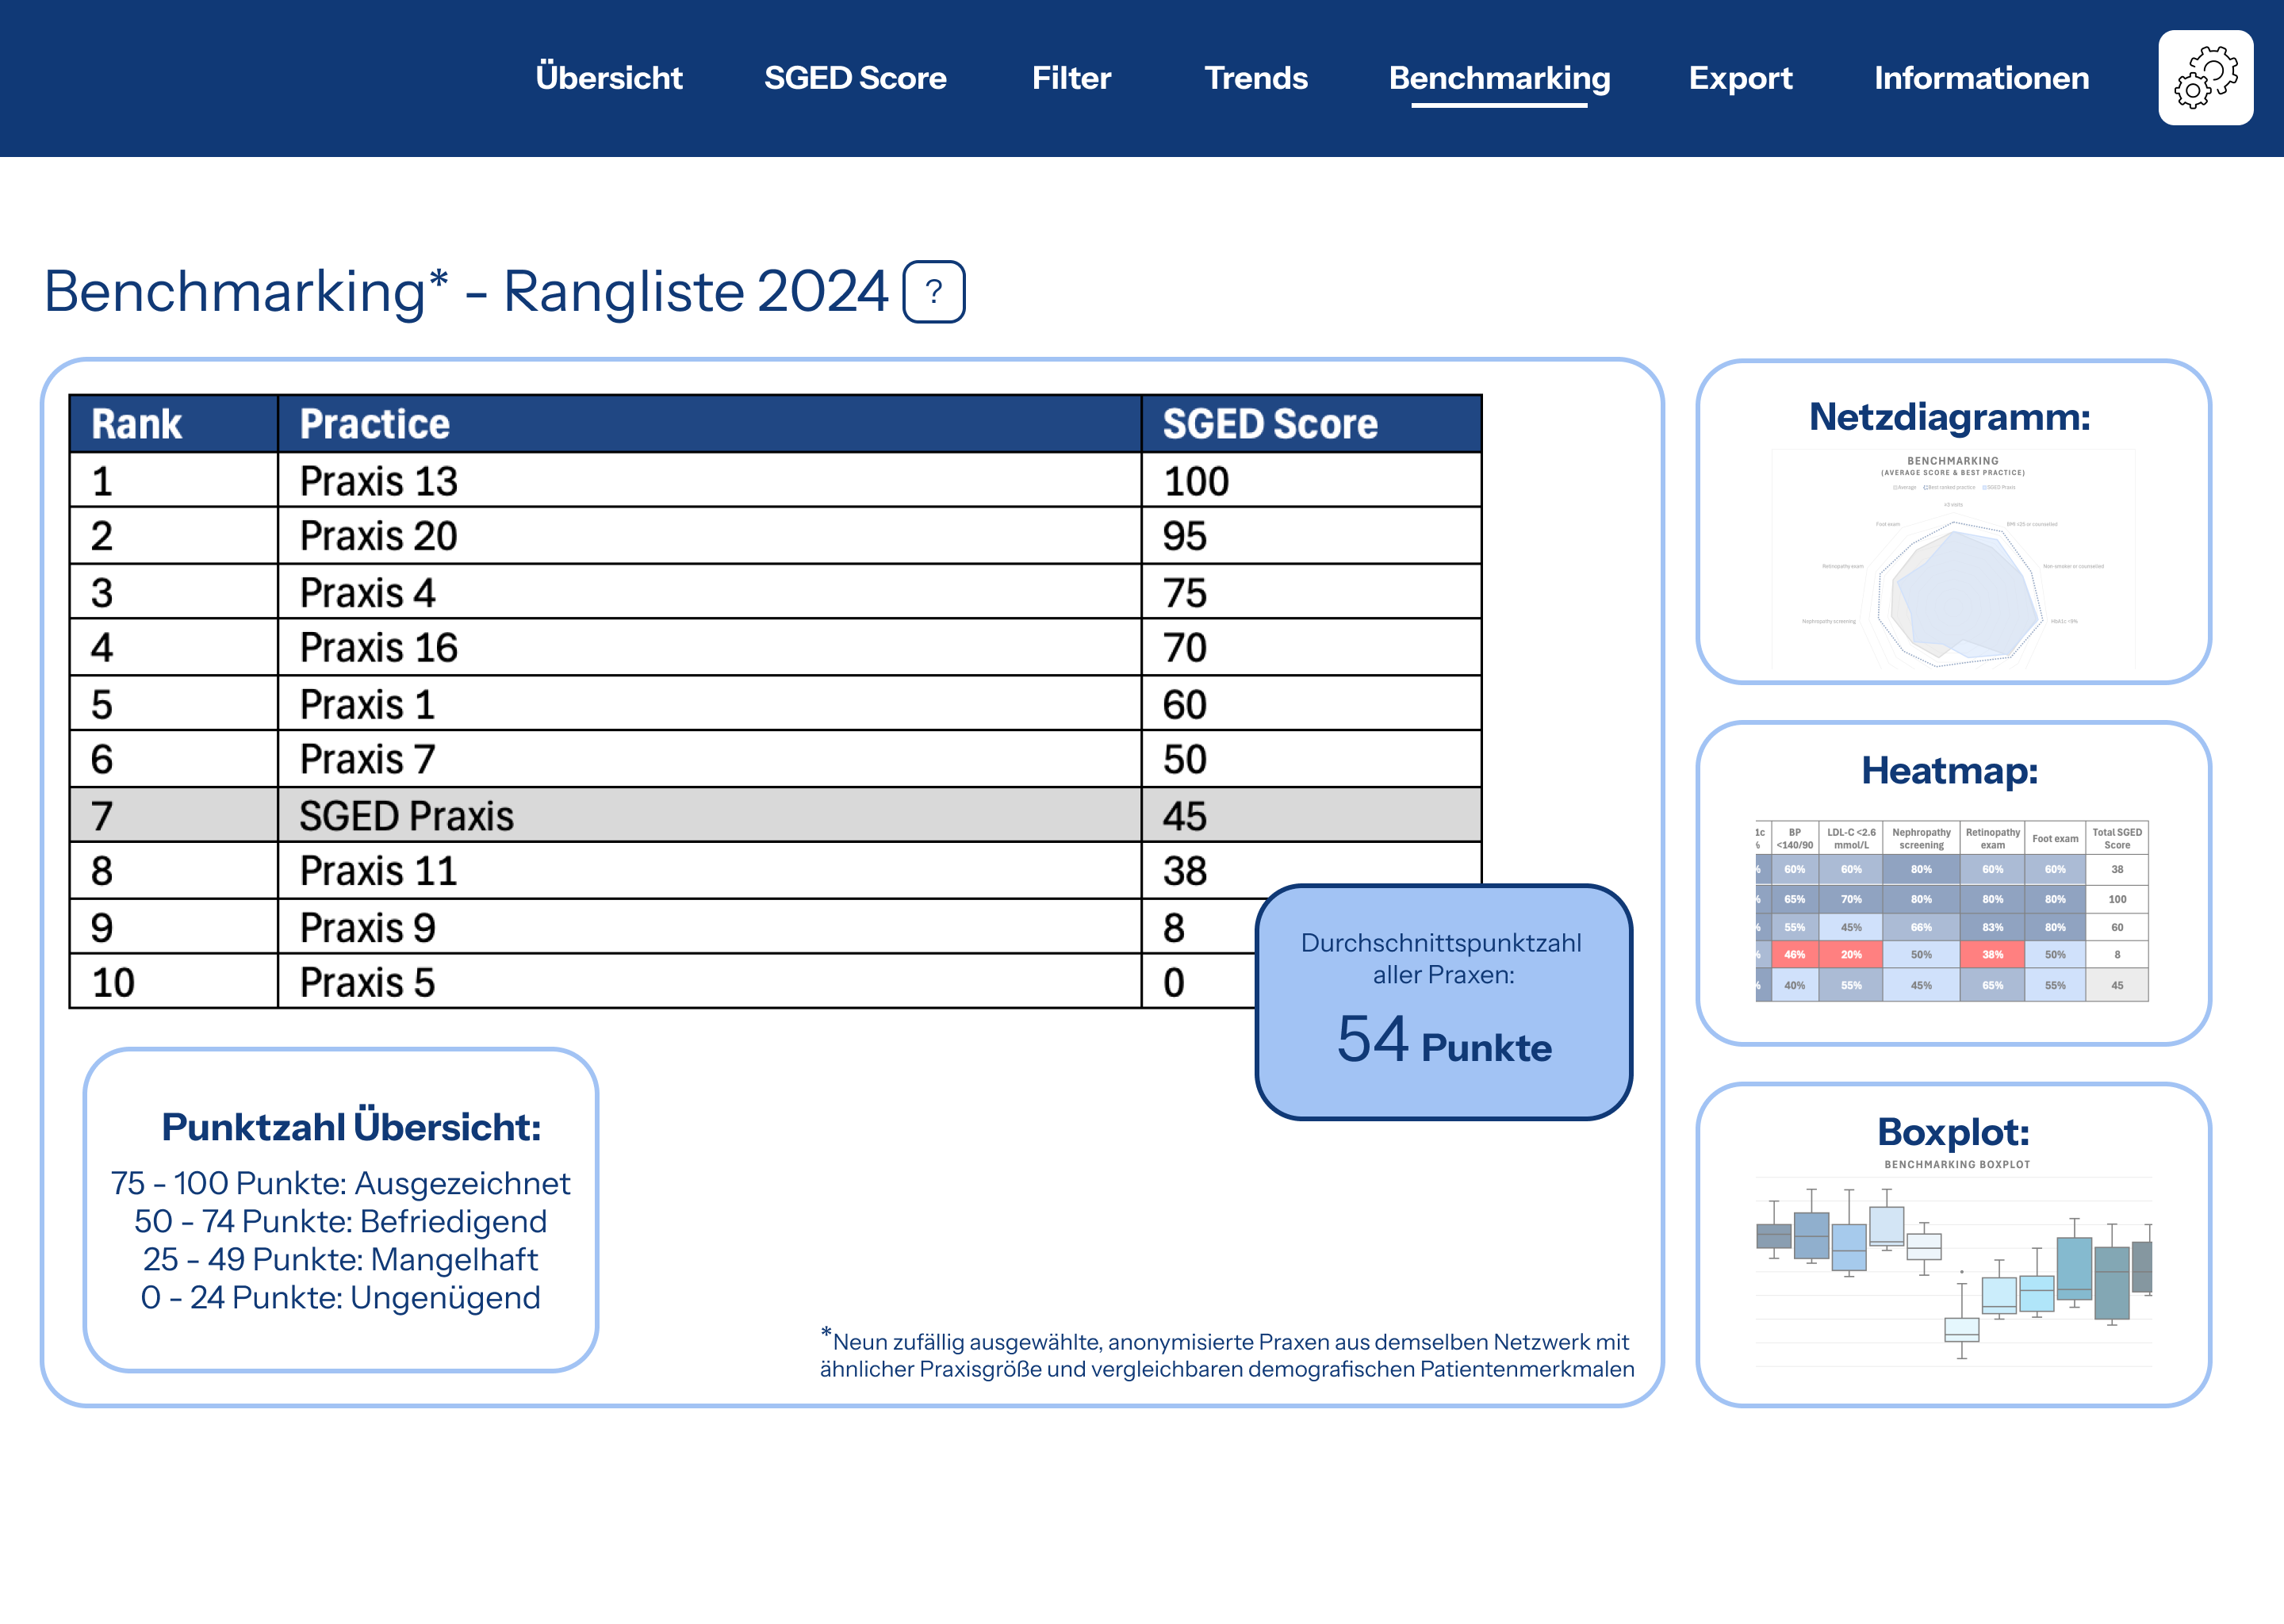


Figure 7: Anonymized benchmarking within the network


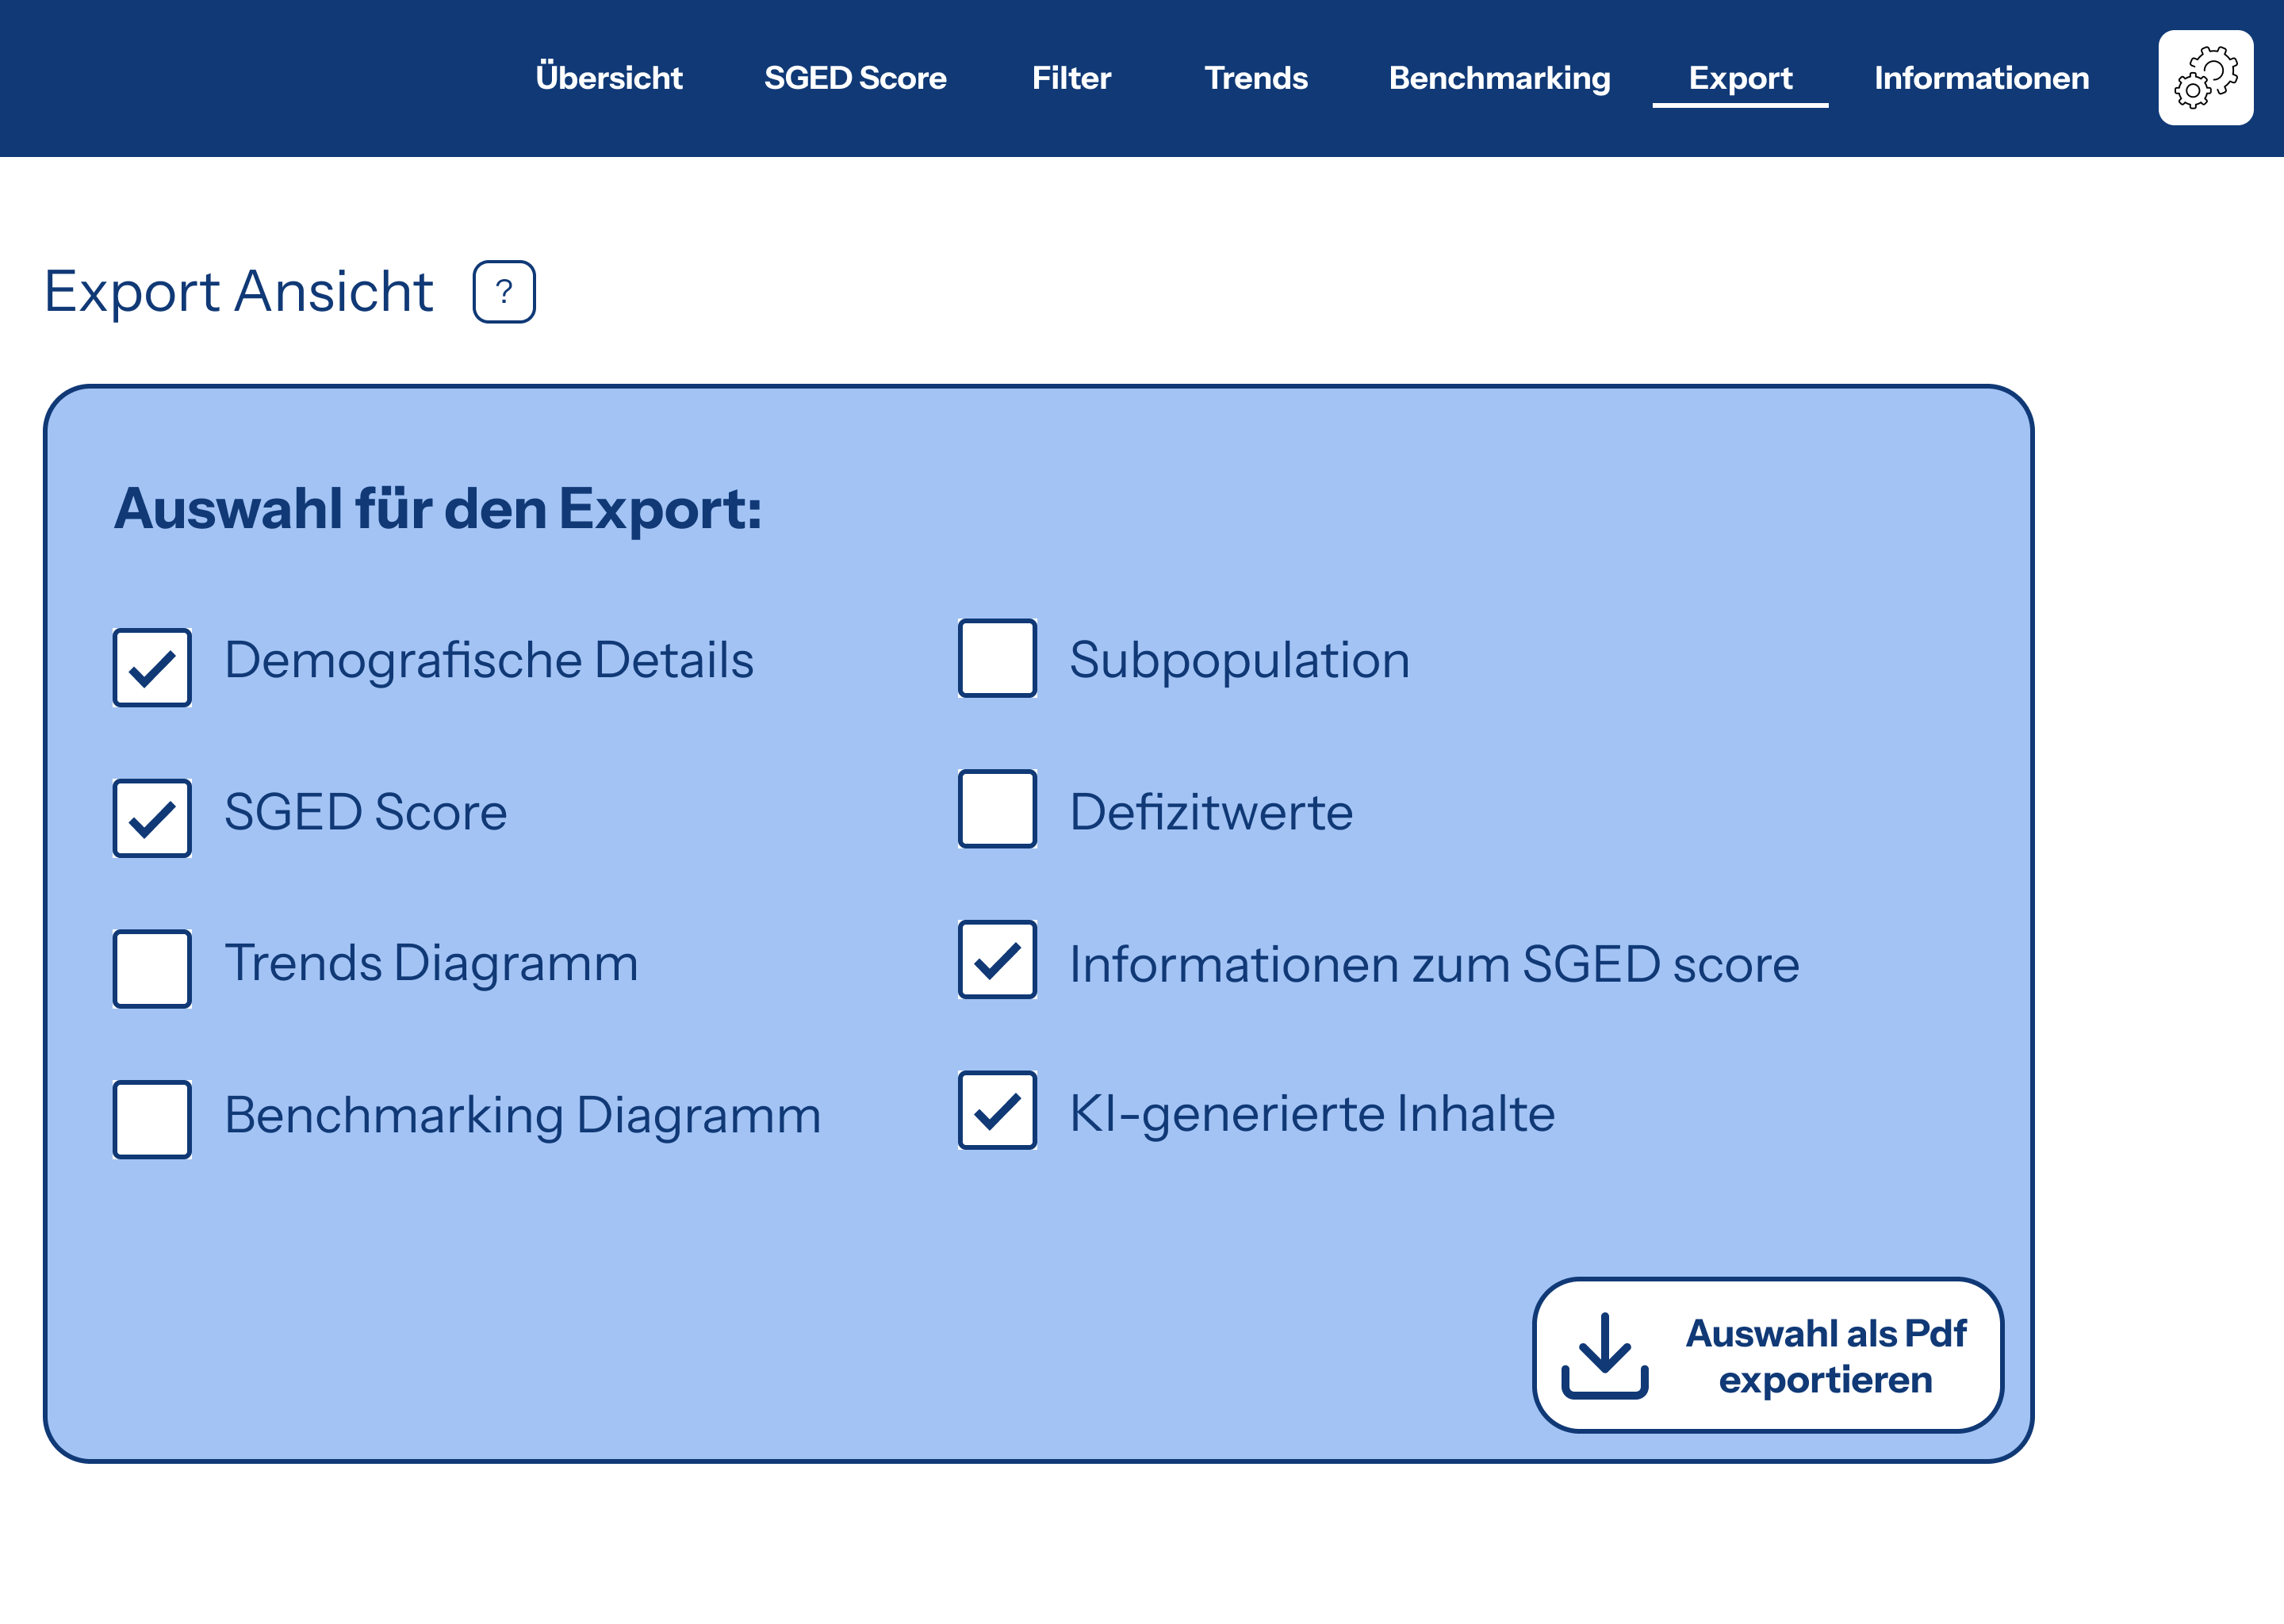


Figure 8: Exporting and reporting function


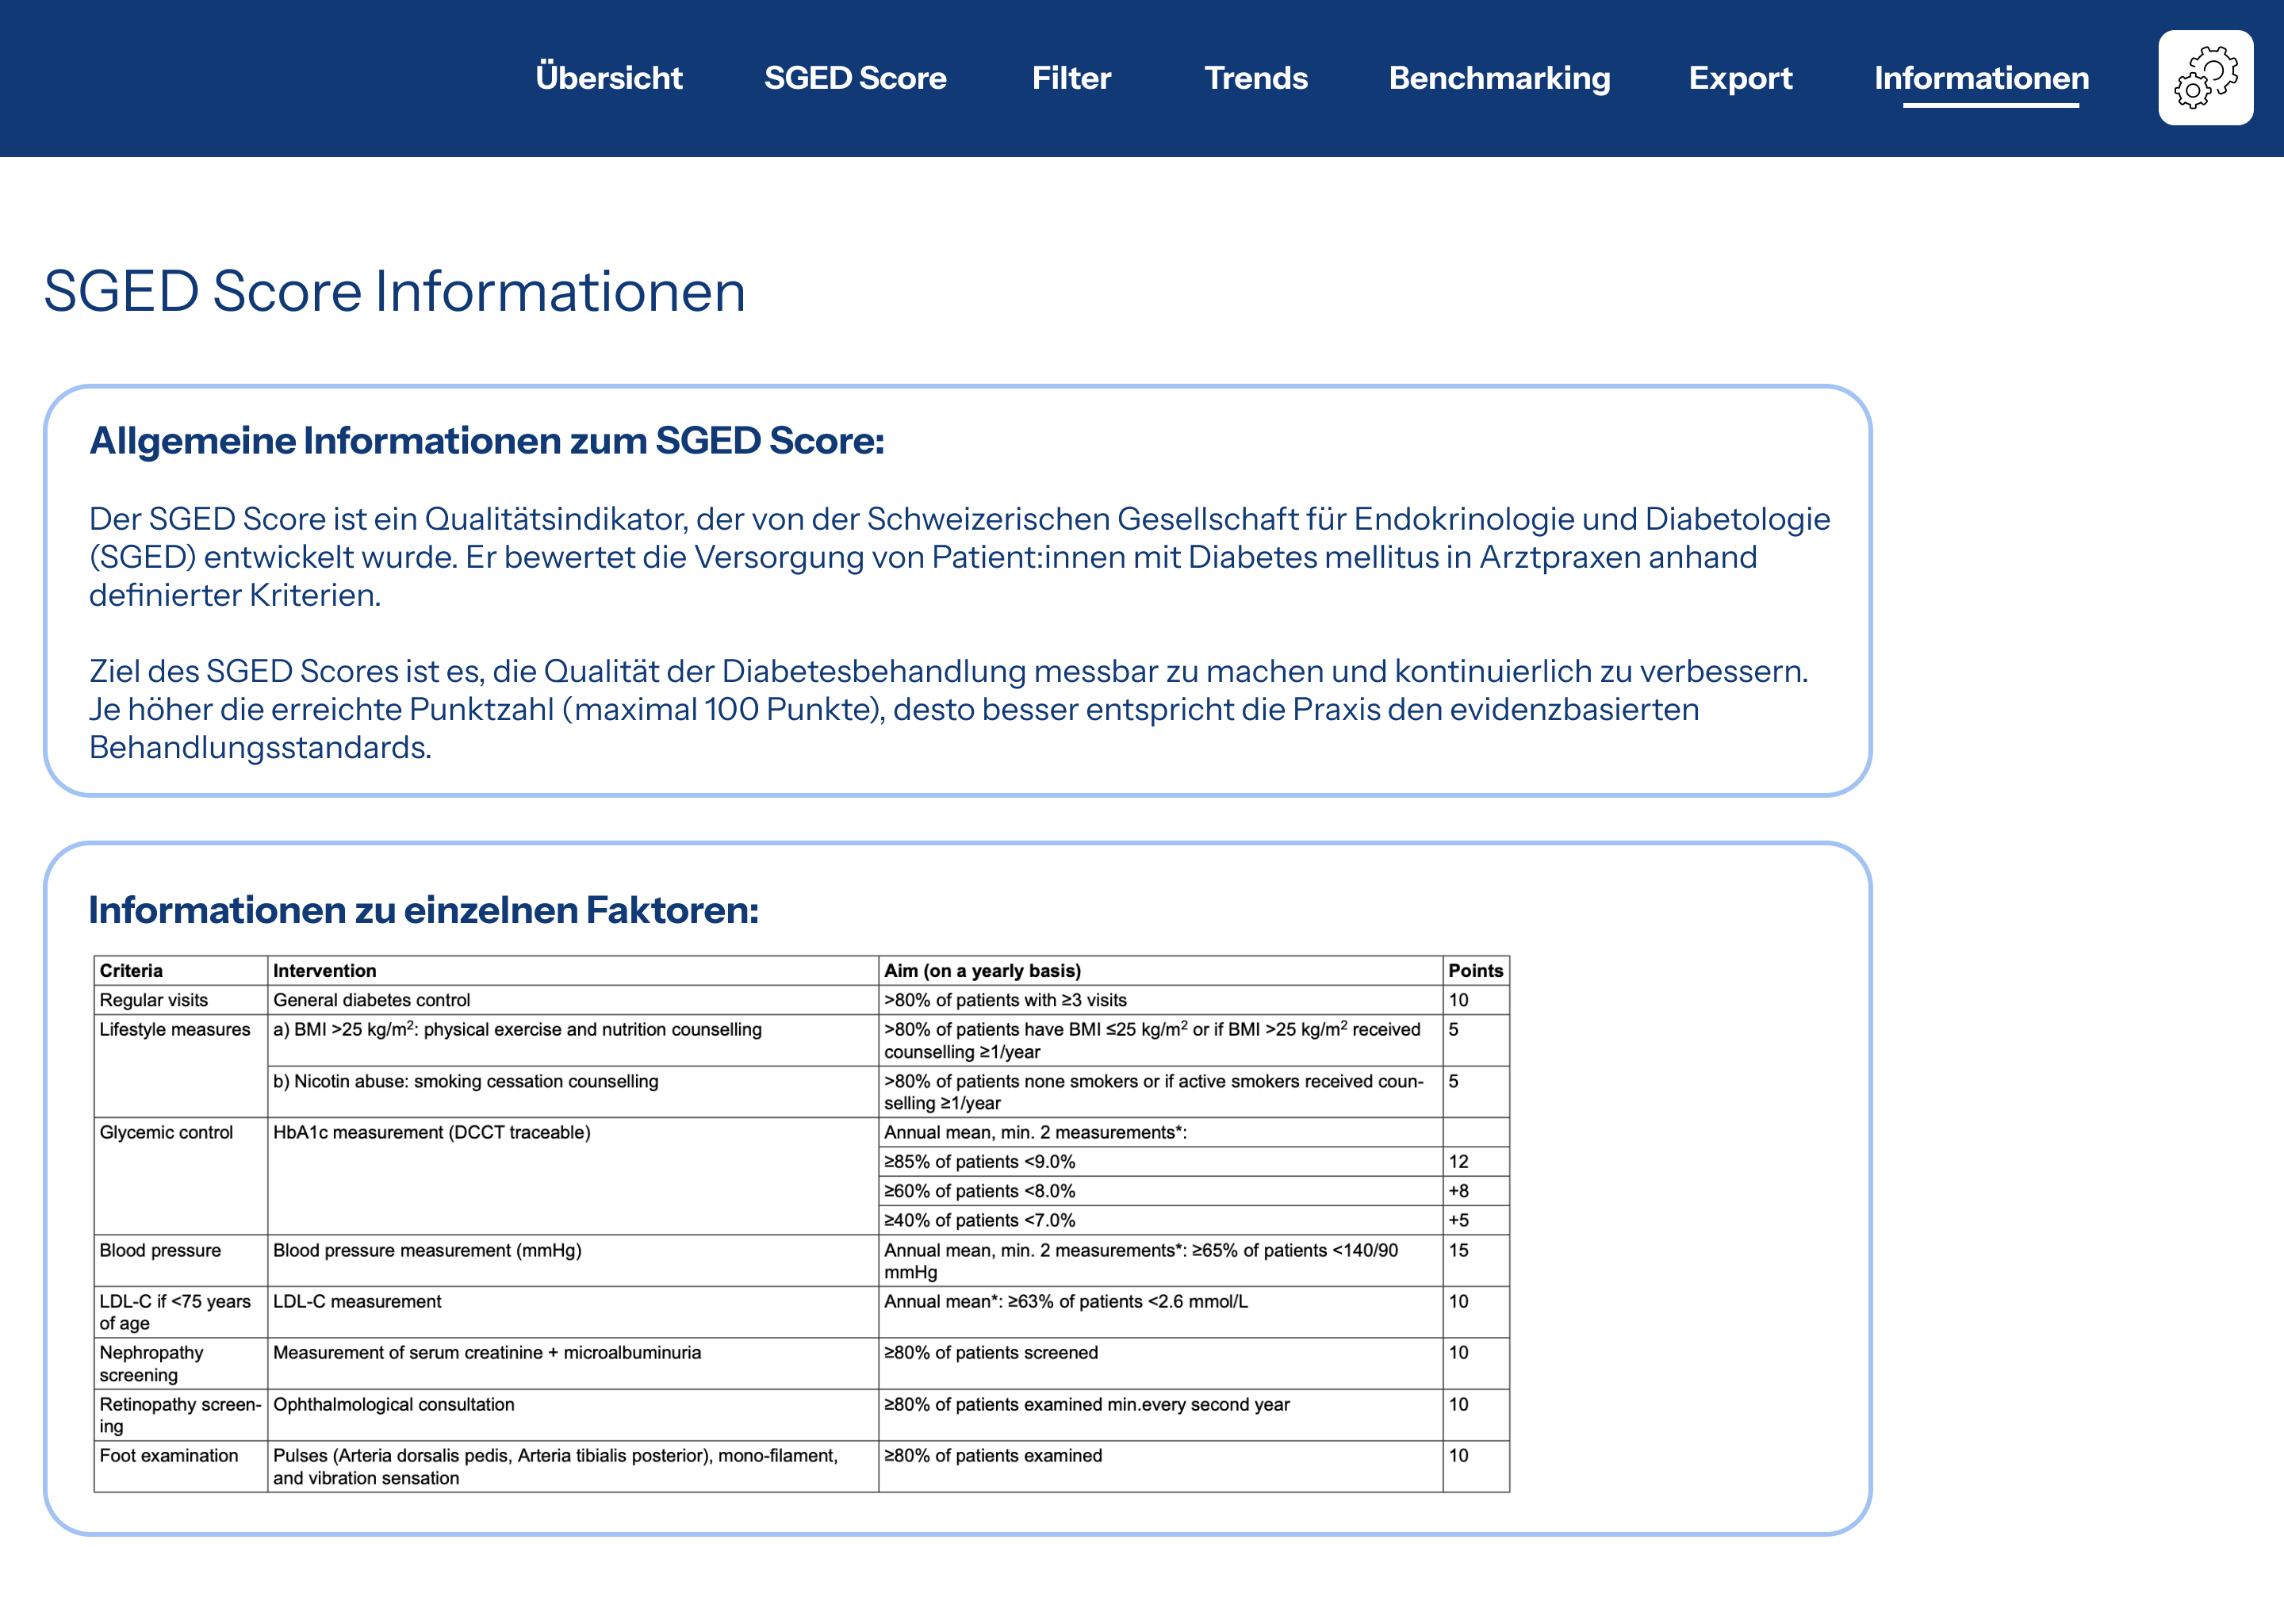


Figure 9: Information regarding the SGED score


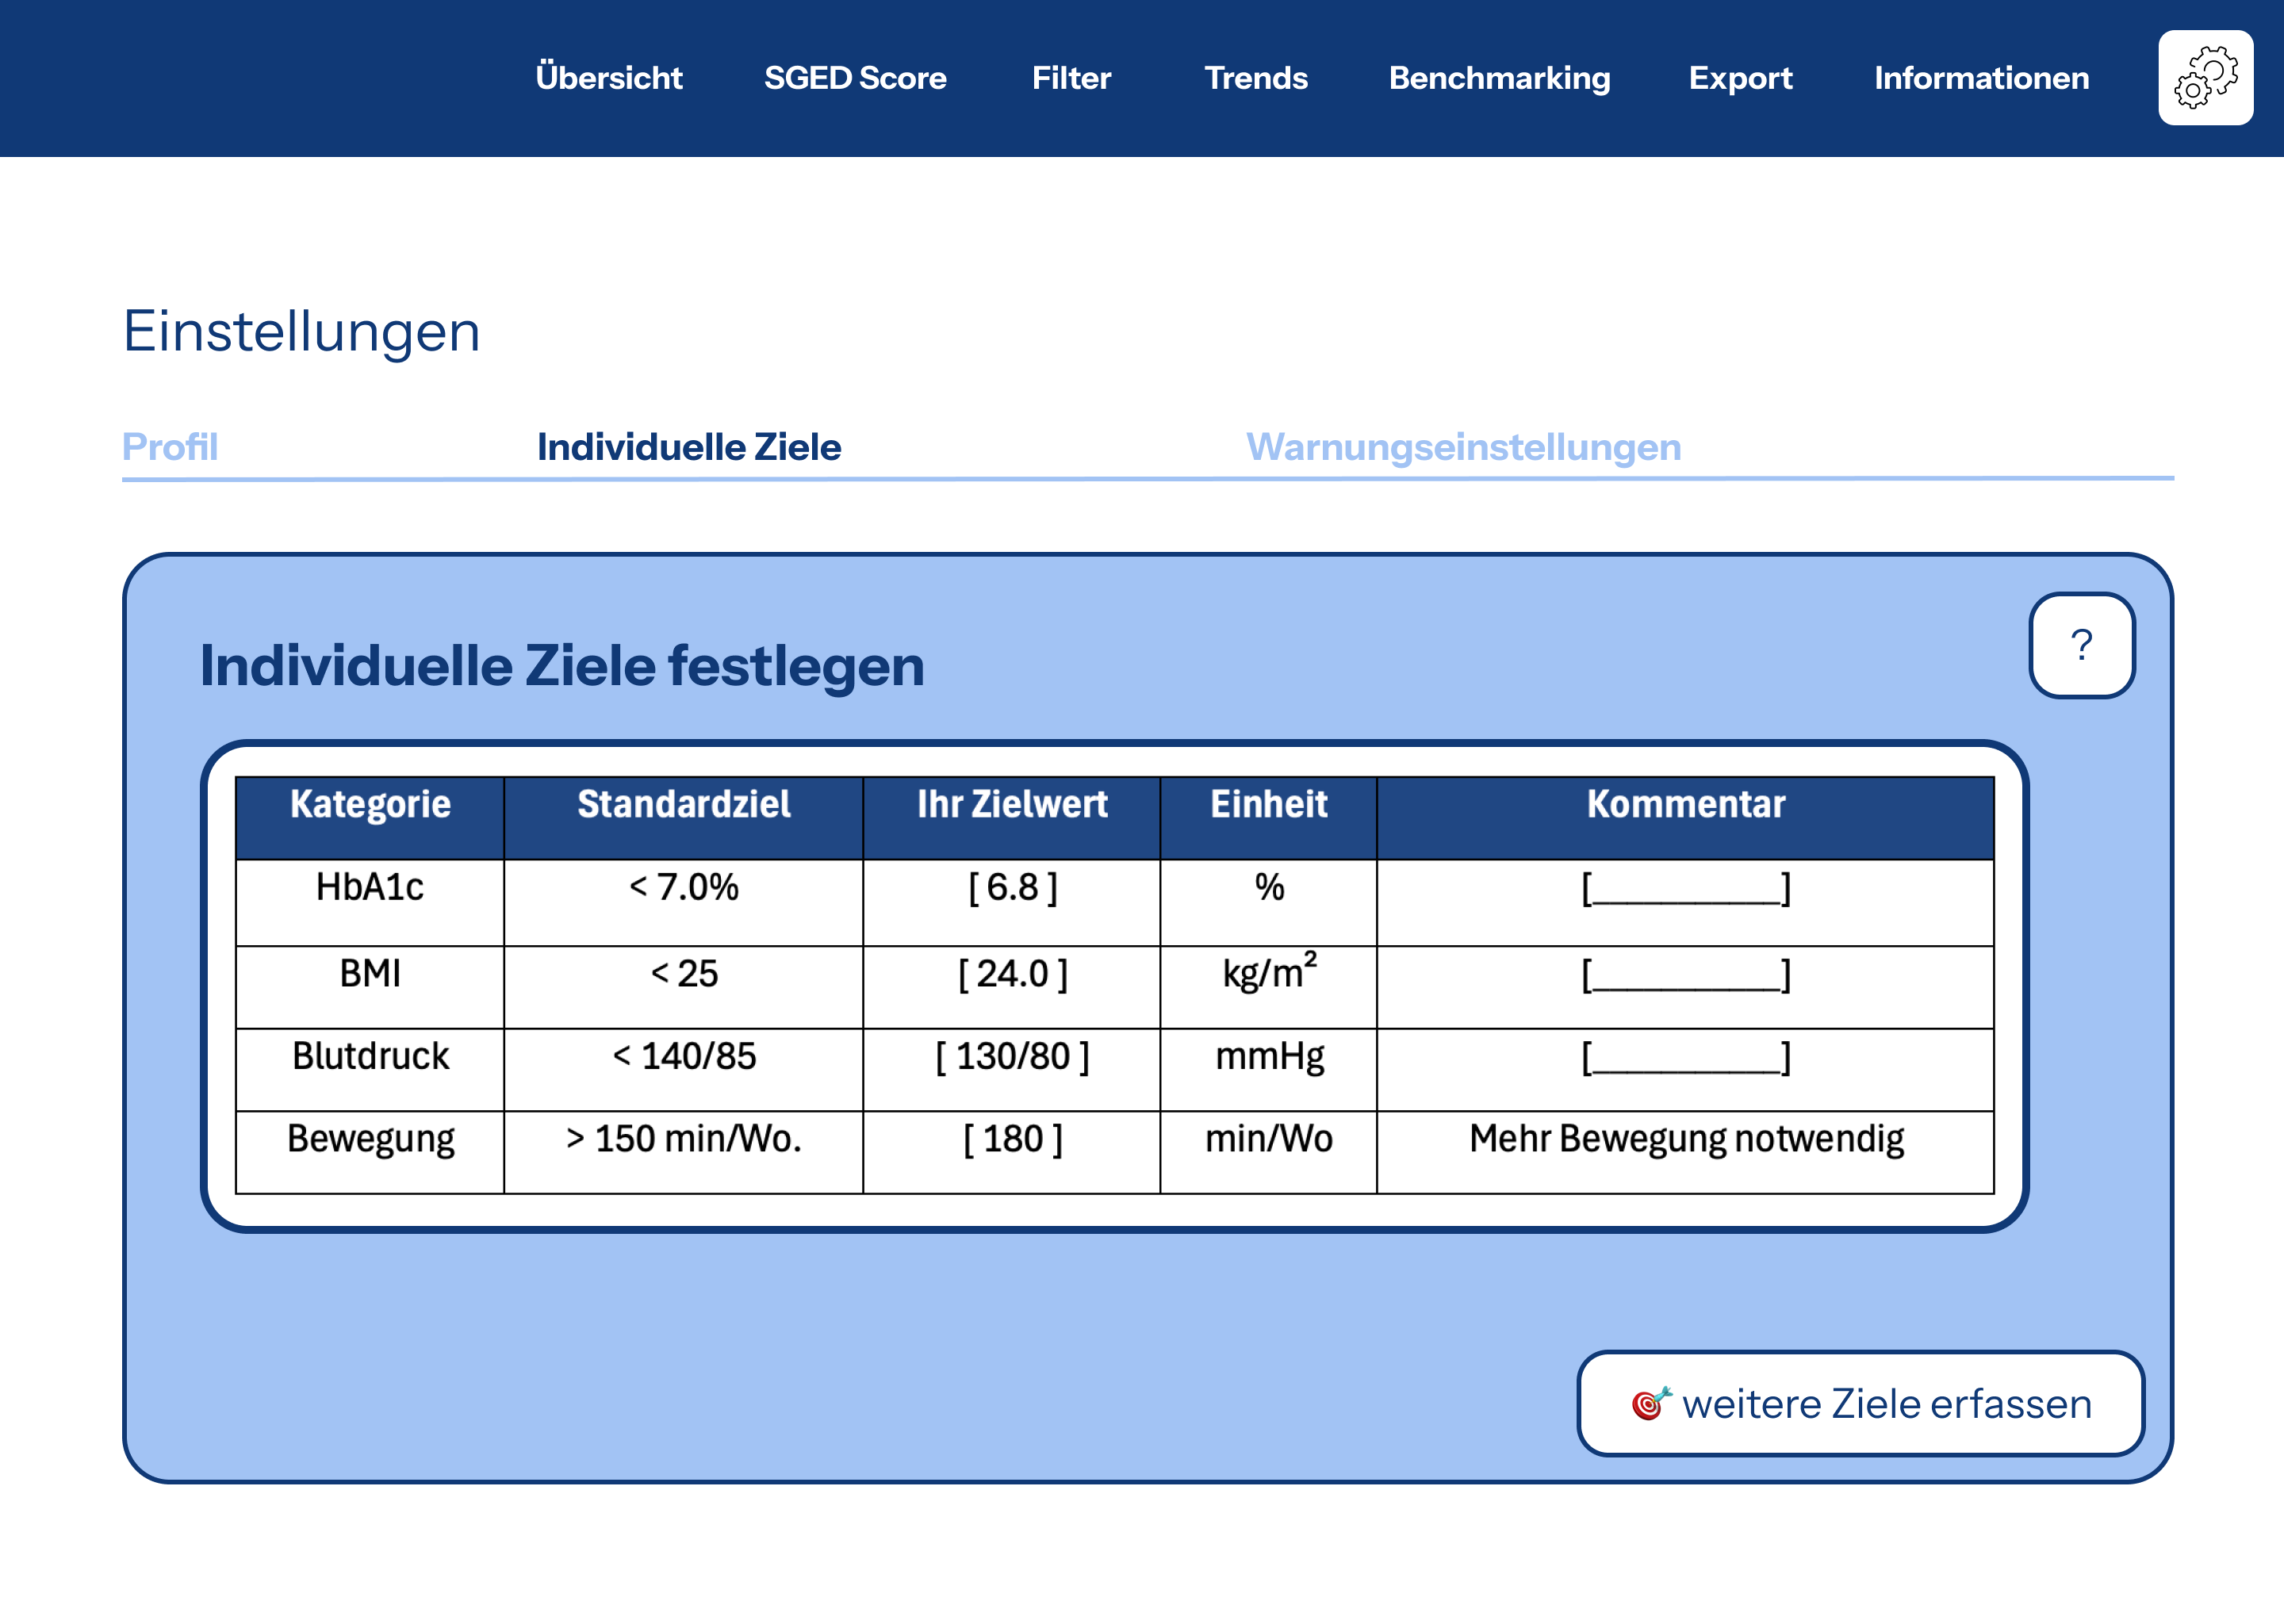


Figure 10: Customizable user flow (setting user specific goals)


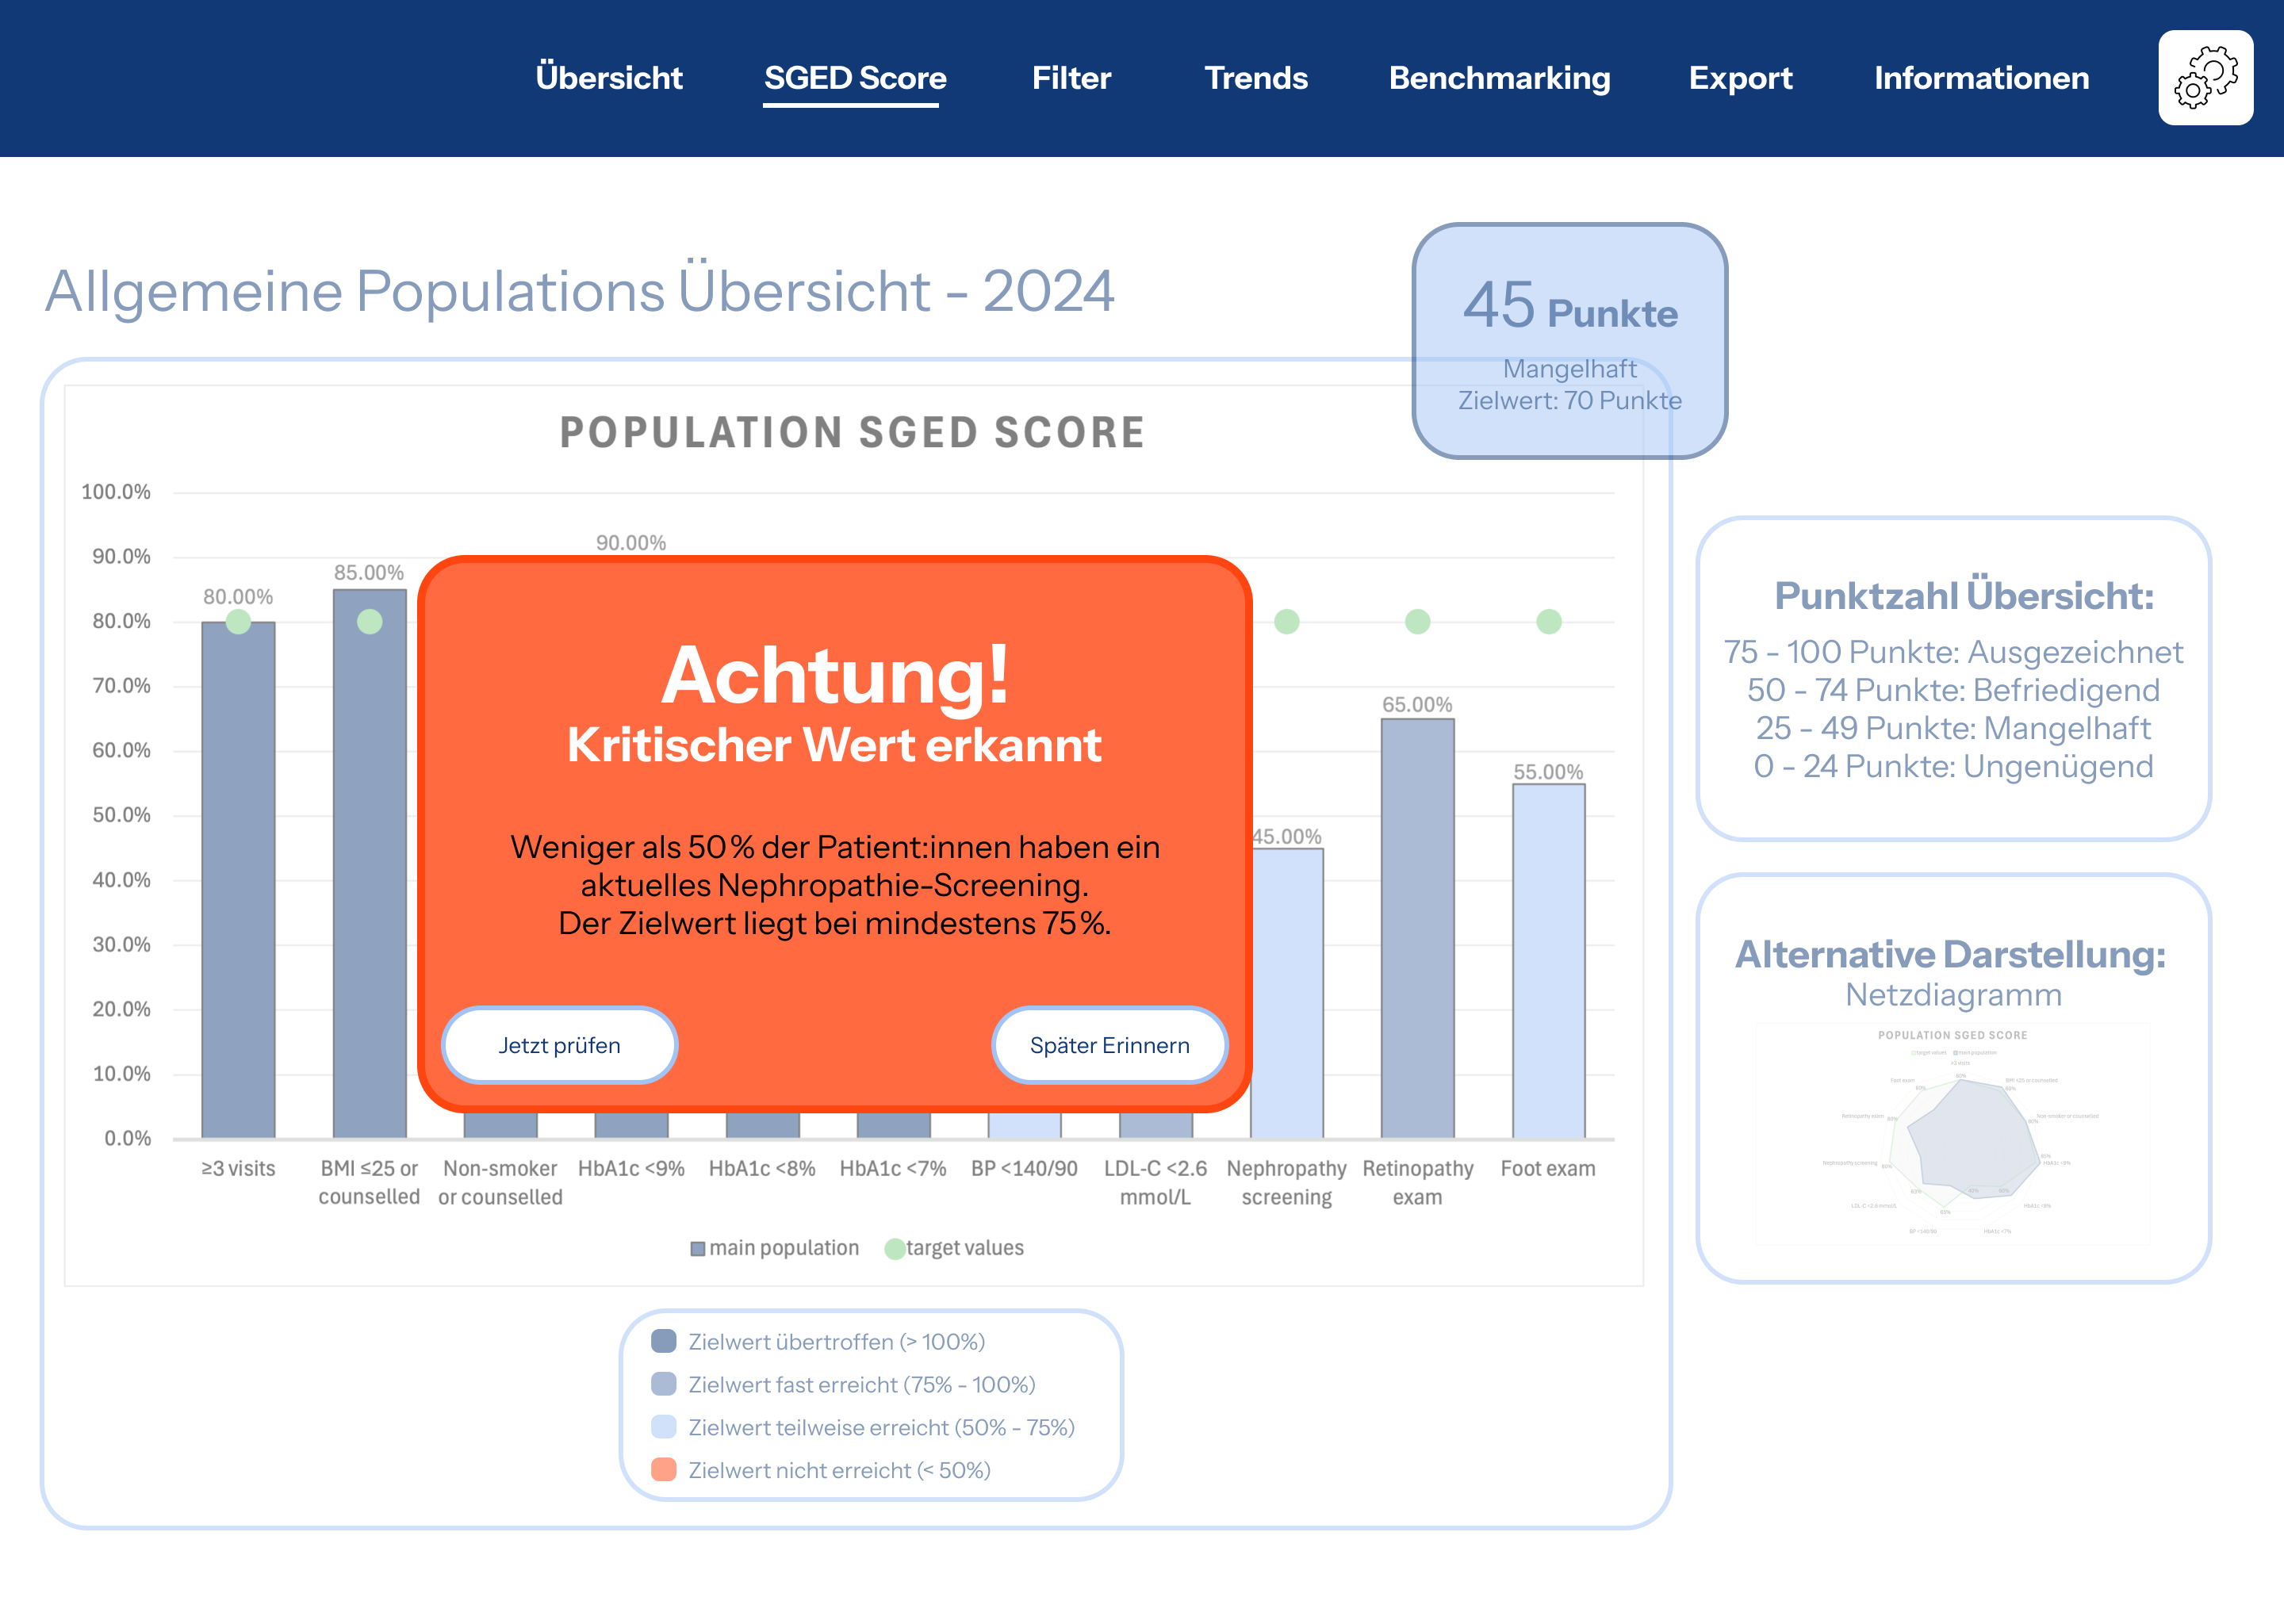


Figure 11: Reminder and alert functions


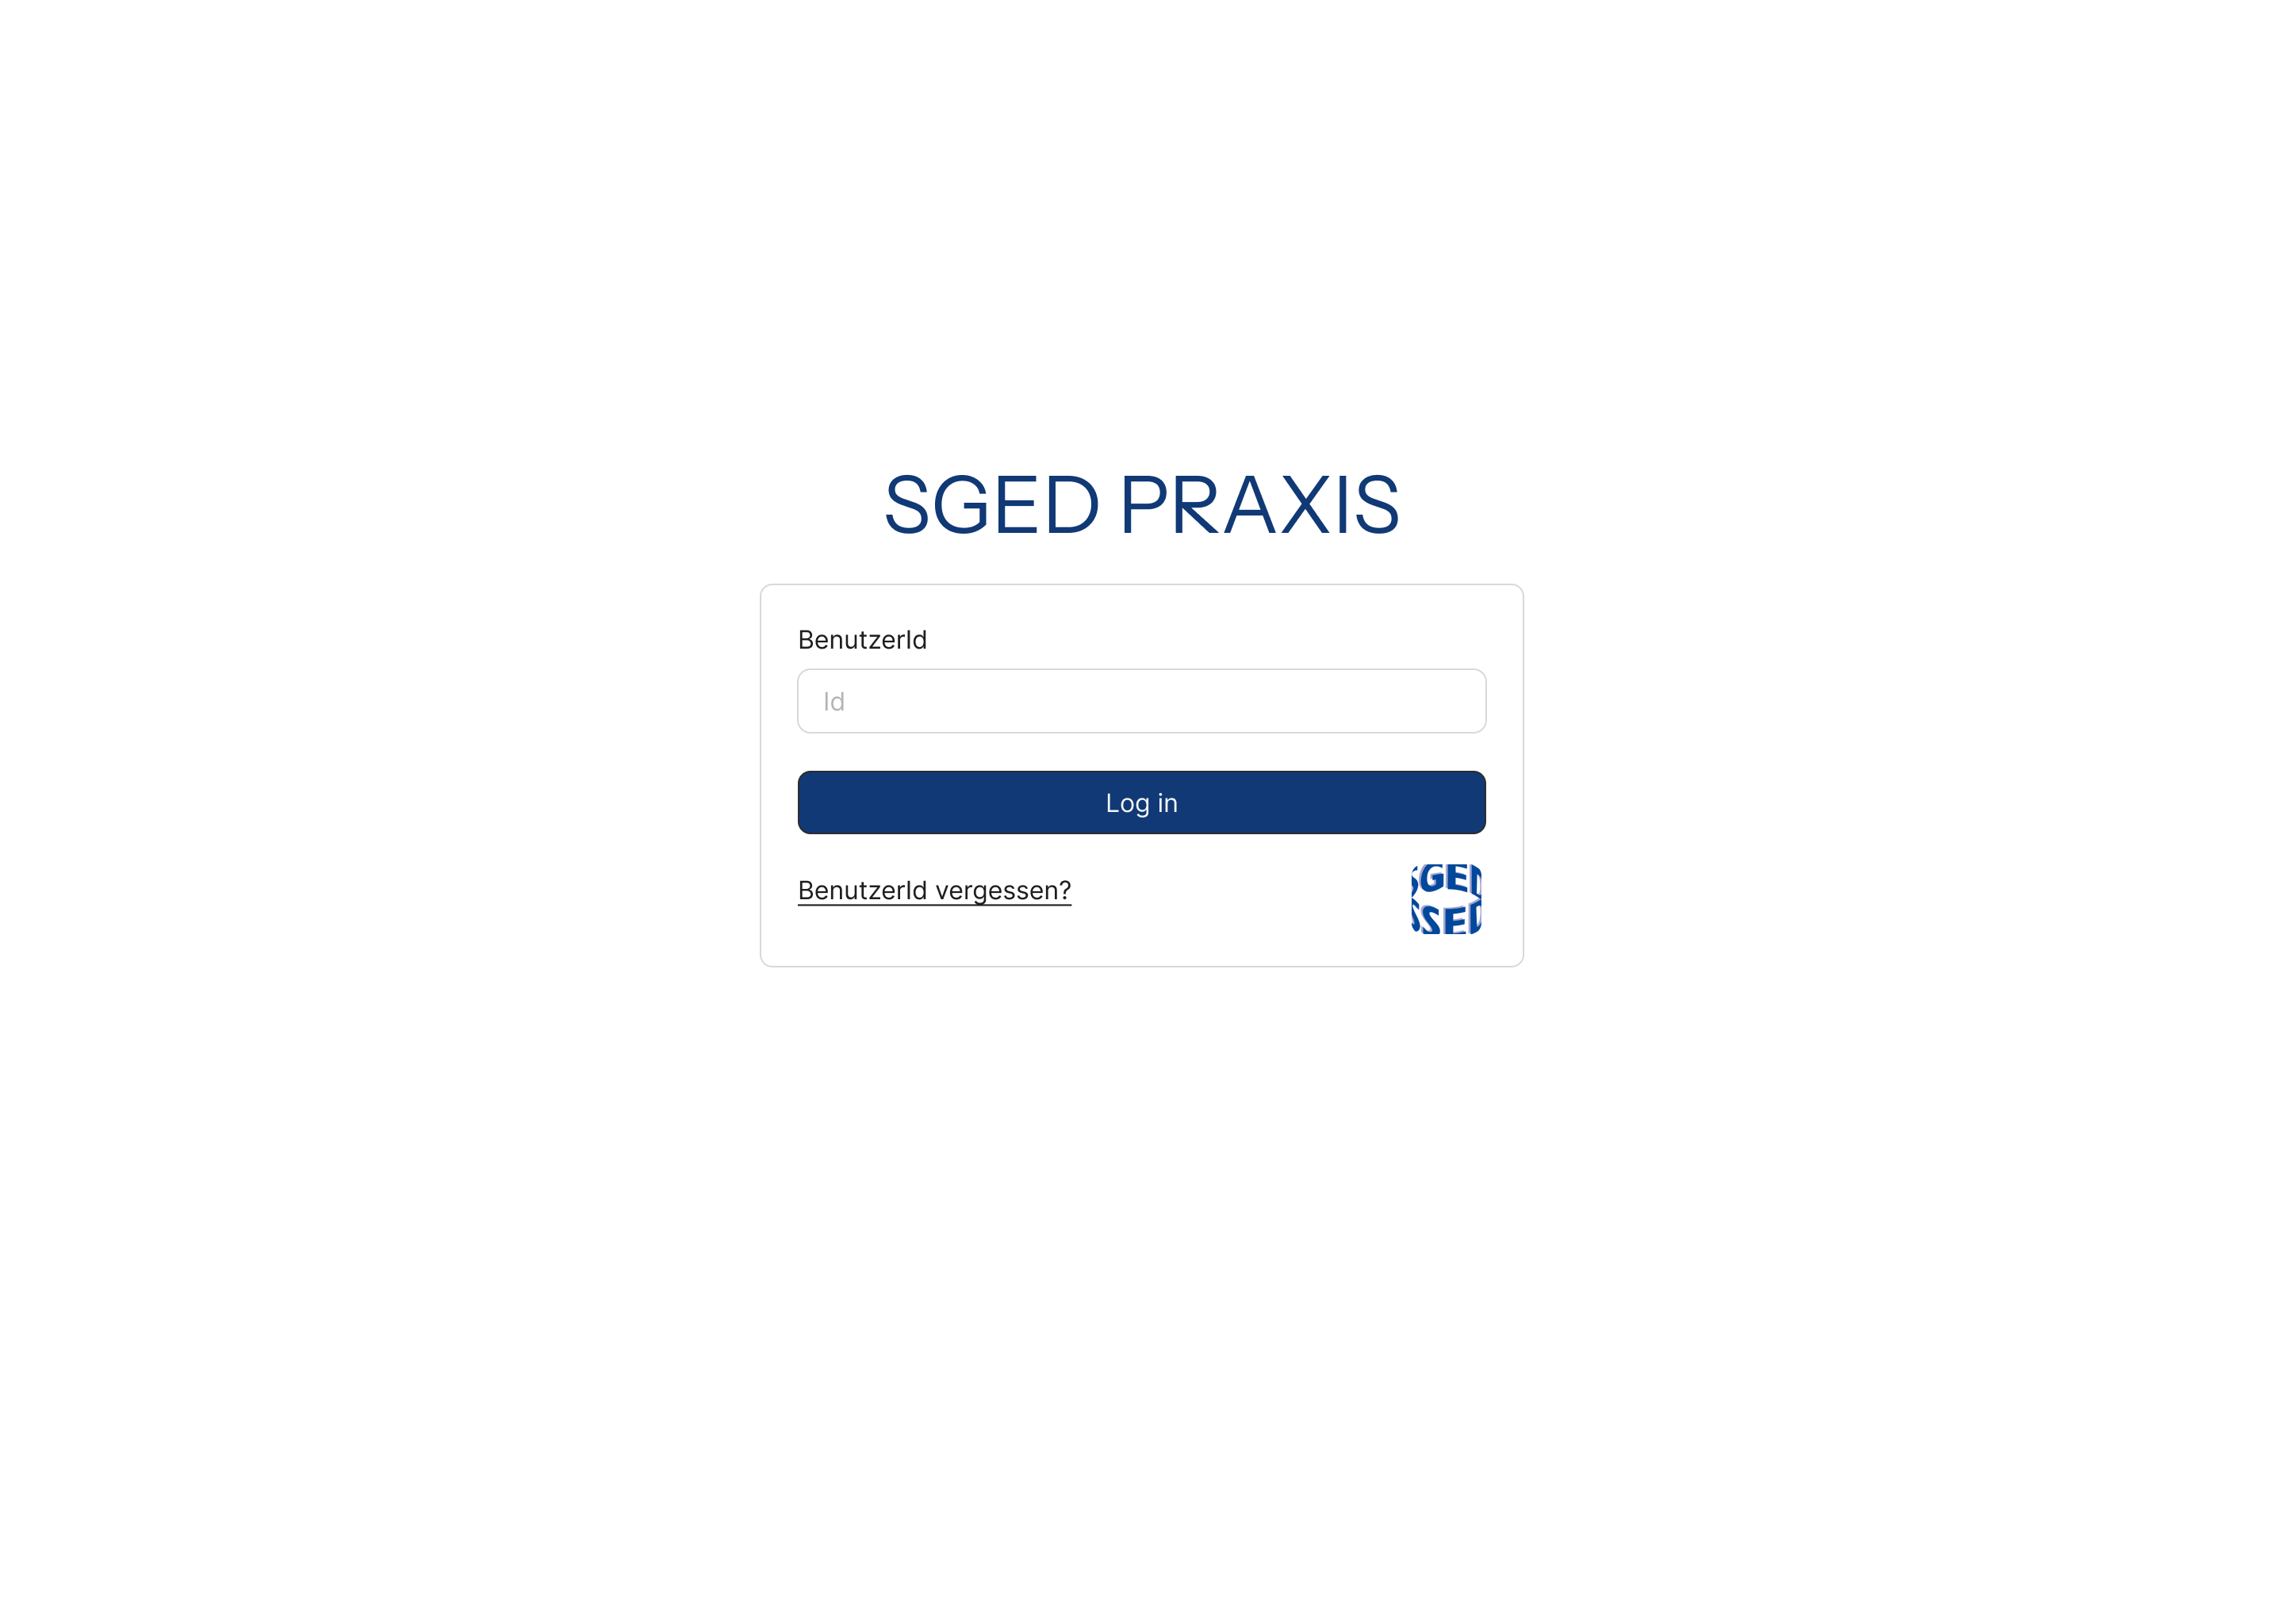


Figure 12: Role-based access
